# Dynamics of age-related catastrophic mitotic failures and recovery in yeast

**Authors:** Matthew M. Crane<sup>1\*</sup>, Adam E. Russell<sup>1+</sup>, Brent J. Schafer<sup>1+</sup>, Mung Gi Hong<sup>1</sup>, Joslyn E. Goings<sup>1</sup>, Kenneth L. Chen<sup>1,2,3</sup>, Ben W. Blue<sup>1</sup> and Matt Kaeberlein<sup>1\*</sup>

<sup>1</sup>Department of Pathology, University of Washington, Seattle, WA, USA.

<sup>2</sup>Department of Genome Sciences, University of Washington, Seattle, Washington, USA

<sup>3</sup>Medical Scientist Training Program, University of Washington, Seattle, Washington USA

<sup>+</sup>Authors contributed equally

<sup>\*</sup>Correspondence to: [mcrane2@uw.edu](mailto:mcrane2@uw.edu) ; [kaeber@uw.edu](mailto:kaeber@uw.edu)

**Abstract:** Genome instability is a hallmark of aging and contributes to age-related disorders such as progeria, cancer, and Alzheimer's disease. In particular, nuclear quality control mechanisms and cell cycle checkpoints have generally been studied in young cells and animals where they function optimally, and where genomic instability is low. Here, we use single cell imaging to study the consequences of increased genomic instability during aging, and identify striking age-associated genome missegregation events. During these events the majority of mother cell chromatin, and often both spindle poles, are mistakenly sent to the daughter cell. This breakdown in mitotic fidelity is accompanied by a transient cell cycle arrest that can persist for many hours, as cells engage a retrograde transport mechanism to return chromosomes to the mother cell. The repetitive ribosomal DNA (rDNA) has been previously identified as being highly vulnerable to age-related replication stress and genomic instability, and we present several lines of evidence supporting a model whereby expansion of rDNA during aging results in nucleolar breakdown and competition for limited nucleosomes, thereby increasing risk of catastrophic genome missegregation.

**Main Text:** Each cell cycle involves a delicate choreography of duplicating genetic material and cellular organelles, and apportioning them appropriately between mother and daughter cell. Failures of cell cycle regulation can result in severely compromised fitness or cells that respond improperly to environmental cues and emerge as cancerous precursors (Hanahan and Weinberg, 2011). In particular, aneuploidy (the gain or loss of partial or whole chromosomes) can be deleterious to fitness (Beach et al., 2017; Sunshine et al., 2016) and has been implicated in many different types of cancers (Gordon et al., 2012) as well as developmental diseases such as Down Syndrome (Nagaoka et al., 2012). Recent work has also documented extensive damage and genomic rearrangements that can occur from micronuclei or from telomeric crisis (Maciejowski et al., 2015; Zhang et al., 2015), and identified the rDNA sequences as particularly vulnerable to genomic damage (Flach et al., 2014; Xu et al., 2017). Mitotic processes and checkpoints of the budding yeast *Saccharomyces cerevisiae* have been extensively studied, but the vast majority of work has focused on logarithmically growing young cells (Beach et al., 2017; Dotiwala et al., 2007; London and Biggins, 2014; Palmer et al., 1989; Santaguida and Amon, 2015). By studying nuclear dynamics in yeast as they age, we have uncovered a cause of age-associated genomic instability and an active mechanism to maintain nuclear integrity and proper segregation of genetic material in aged cells.

46 We characterized the dynamics of genome replication and partitioning during replicative  
47 aging by imaging cells expressing fluorescently tagged histone 2B (Htb2:mCherry) in a  
48 microfluidic device over their entire lifespans (Crane et al., 2014). During each cell cycle, the  
49 amount of Htb2 in the mother cell nucleus increases by about two-fold and then drops by one-  
50 half, as the cell enters mitosis and chromosomes are segregated to the newly formed daughter.  
51 The vast majority of cell divisions in young cells follow this characteristic pattern (Figure 1A).  
52 As cells age, however, abnormal segregation events become common (Figure 1B, Videos 1-2,  
53 please ensure volume is on for all Videos to hear audio explanation). The single cell trace shown  
54 in Figure 1C, for example, shows a cell undergoing multiple cell cycles with proper division until  
55 an abnormal segregation occurs in which the majority of detectable histones are sent to the  
56 daughter cell. These genome-level missegregation (GLM) events result in cell cycle arrest that  
57 can range from a few minutes (Figure 1C-top) to many hours (Figure 1C-middle), before they are  
58 usually corrected by returning the aberrantly segregated genetic material to the mother cell. The  
59 range of arrest durations is broad, with most events resolved within an hour, but some lasting  
60 many hours (Figure 1 – figure supplement 1). If corrected by this REtrograde TRansport Nuclear  
61 (RETRN) process, mother cells are able to proceed through subsequent divisions, but if not, the  
62 mother cells will terminally exit the cell cycle and senesce (Figure 1C-bottom).

63 To further characterize GLM and RETRN dynamics during aging, cells were imaged  
64 over their entire replicative lifespan, with birth events, GLMs, and RETRN events assessed. The  
65 probability of a GLM increased dramatically at the end of life (Figure 1D), with approximately  
66 three quarters of mother cells experiencing one or more GLMs (Figure 1E). About 90% of GLMs  
67 were corrected through successful RETRN events, allowing individual mother cells to live  
68 approximately 30% longer on average than if all GLMs were terminal (Figure 1 – figure  
69 supplement 2). However, even when corrected, mother cells that undergo a GLM are more likely  
70 to die in the near future than cells of the same age that have not experienced such an event, and  
71 GLMs become increasingly predictive of impending mortality with increasing age (Figure 1 –  
72 figure supplement 2). To confirm that the histones do indeed co-localize with DNA during these  
73 events, we imaged old mothers and observed the dynamics of Htb2 in cells exposed to the DNA  
74 stain Hoechst 3342. As can be clearly seen (Figure 1F, Videos 3-4), both the DNA and histones  
75 move in concert during these events. Furthermore, we confirmed that histone levels reflect  
76 nuclear DNA abundance in single cells by staining with DAPI and comparing Htb2 levels with  
77 DNA content in old cells (Figure 1 – figure supplement 3). GLM and RETRN dynamics were  
78 not influenced by the fluorophore used or which histone is tagged, as the dynamics of both  
79 Htb2:mCherry and histone 2A tagged with GFP (Hta2:GFP) did not differ (Figure 1 – figure  
80 supplement 4). GLM and RETRN frequency is not an artifact of our imaging protocol, as  
81 modifying the excitation power or the cumulative excitation energy exposure had no effect on  
82 these observations (Figure 1 – figure supplement 5). For clarity, the strain containing  
83 Htb2:mCherry is referred to as wild-type hereafter.

84 In order to observe the nuclear periphery during GLM and RETRN events, we imaged  
85 aging cells expressing both Htb2:mCherry and Nup49:GFP, and compared normal divisions  
86 (Video 5) with RETRN events (Figure 1G-top, Video 6) and terminal GLMs (Figure 1G-bottom,  
87 Video 7). The dynamics of the histone missegregation and recovery can be clearly seen in these  
88 time-lapse series, and strikingly the mother cells retain an intact nuclear envelope during these  
89 events – even if they lose all the chromatin (Figure 1G). Passage of the histones fully into the  
90 daughter cell is evident from cells co-expressing a bud neck marker (Myo1:GFP) along with  
91 Htb2:mCherry (Videos 1-2). Interestingly, during these events both spindle poles often enter the

92 daughter and move in concert with the tagged histones (Figure 1H). Spindle missegregation and  
 93 RETRN was visualized through time-lapse imaging of aging cells expressing the spindle  
 94 component Spc72 tagged with GFP (Spc72:GFP, Video 8). In terminal GLMs without RETRN,  
 95 both spindle poles generally remain in the daughter cell (Figure 1H, Video 9). This can also be  
 96 observed in videos where tubulin is tagged with GFP (Tub1:GFP), and all of the detectable  
 97 nuclear microtubules enter the daughter cell during GLMs (Video 10-11).  
 98

**Fig 1**

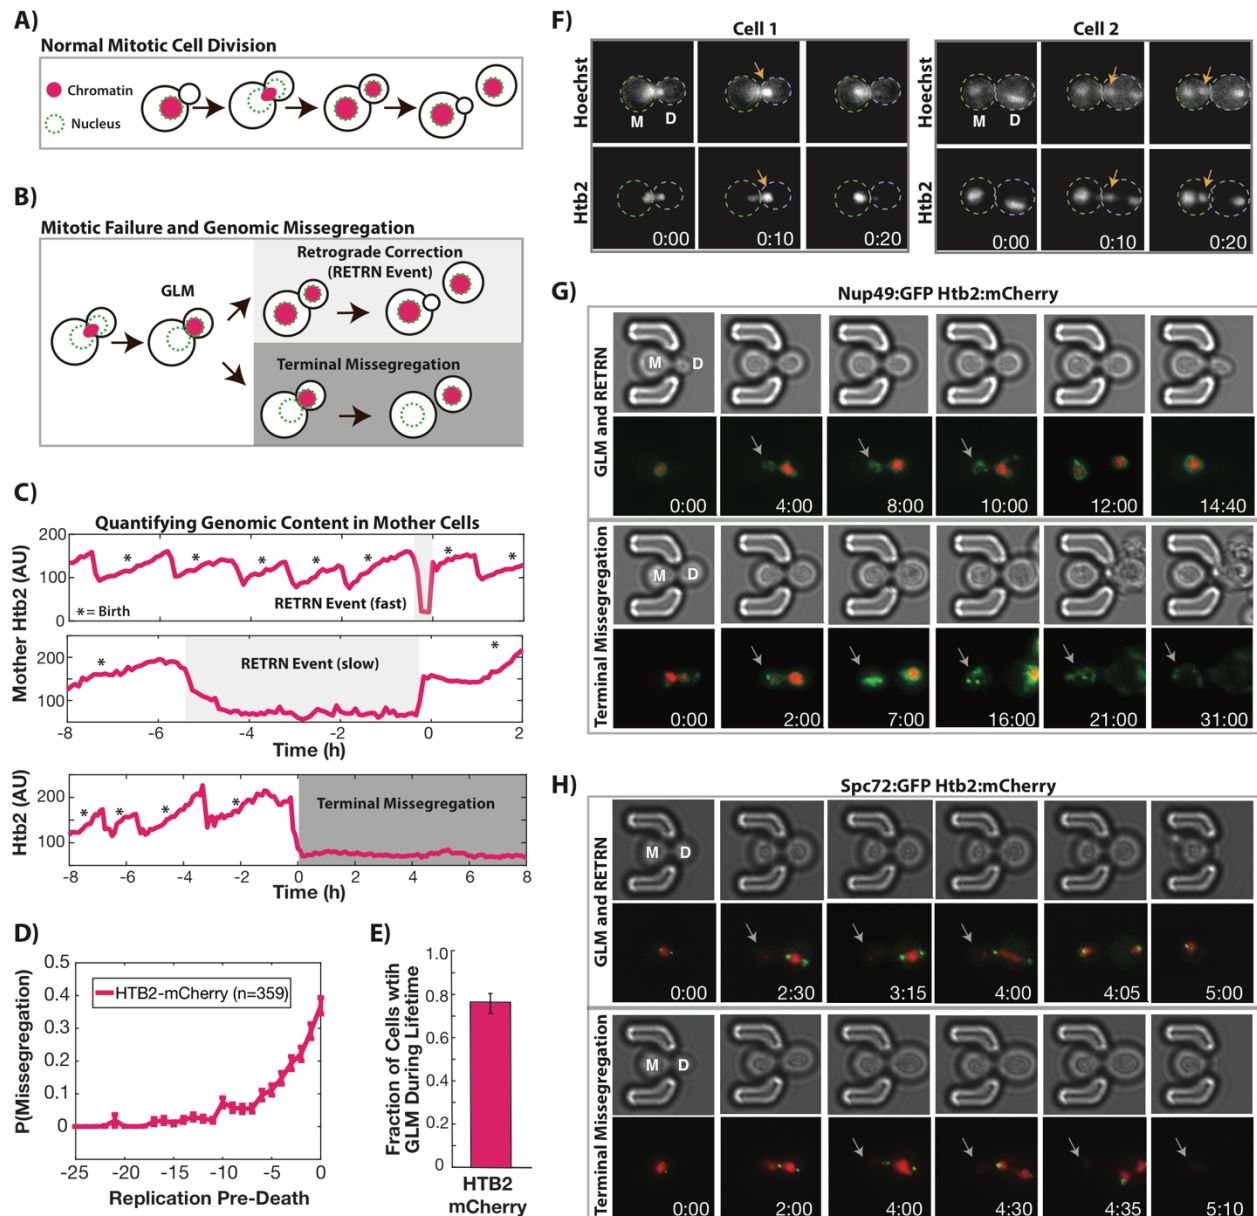

99  
 100 **Fig. 1.** During replicative aging cells frequently undergo dramatic genomic missegregation events. **A)** Schematic  
 101 showing the process of a normal cell division where chromatin (red) doubles during S-phase and is divided between  
 102 mother and daughter during mitosis. **B)** Aging cells frequently experience Genome Level Missegregation (GLM)  
 103 events where most genomic material enters the daughter while the nuclear envelope stays behind. Usually this  
 104 missegregation is corrected (top, RETRN event), allowing mother cells to go on to divide and produce more

105 daughters. If not corrected and cytokinesis occurs (bottom), this becomes a terminal event wherein mother cells  
106 replicatively senesce. C) Representative single cell traces of mother Htb2 levels showing missegregation (shaded)  
107 and active retrograde correction events. Corrections can occur quickly (top), or can take hours to be completed  
108 (middle). A GLM becomes terminal (bottom) if it is not corrected. (\*) indicates the formation of new buds, and both  
109 cells with RETRN events produce additional daughters. AU indicates arbitrary units. D) Missegregation  
110 probabilities increase dramatically near the end of replicative lifespan. n=359 mother cells examined. E) Over their  
111 entire replicative lifespan, individual mother cells have a greater than 70% chance of having one or more  
112 missegregation events. F) Genomic DNA and histones co-localize during GLM events. Two cells expressing  
113 Htb2:mCherry and stained with a live DNA dye Hoechst 3342. G) Time-lapse dynamics of a GLM with RETRN  
114 correction (top, mother cell replicative age 14) and a terminal missegregation (bottom, mother cell replicative age  
115 12) in cells co-expressing Htb2:mCherry and Nup49:GFP. During both GLMs the nuclear envelope is clearly visible  
116 in both mother (M) and daughter (D) cells. See Videos 6 and 7. H) Time-lapse dynamics of a GLM with RETRN  
117 correction (top, mother cell replicative age 13) and a terminal missegregation (bottom, mother cell replicative age  
118 16) in cells expressing Htb2:mCherry and Spc72:GFP. Both spindle poles can be seen to enter the daughter (D)  
119 during these events, and during the RETRN event a spindle pole returns to the mother (M). In the terminal  
120 missegregation, the spindle pole fails to reenter the mother cell. See Videos 8 and 9. Times are indicated in  
121 hours:mins from the start of the displayed time-lapse, not the start of the experiment. Arrows indicate mother cells  
122 without visible chromatin.

123  
124 To investigate the temporal and cell cycle dynamics of the genome missegregation and  
125 RETRN events, we employed two cell cycle reporters, Whi5:GFP and Myo1:GFP (Di Talia et al.,  
126 2007). Whi5 prevents exit from G1 when localized in the nucleus, and the transition of Whi5  
127 from the nucleus to the cytoplasm signifies the end of G1 (Figure 2A) (Charvin et al., 2010).  
128 Individual young cells proceed in a reliable fashion through the cell cycle, with Whi5 becoming  
129 nuclear localized immediately after Htb2 levels fall and the cell enters telophase (FigureS6). By  
130 aligning all annotated cell divisions without GLMs (Figure 2B), the temporal dynamics of  
131 histone separation into the daughter cells are clear and immediately followed by the transition of  
132 Whi5 from the cytoplasm into the nucleus. In contrast, when a GLM occurs, Htb2 levels fall  
133 precipitously in mother cells, but the cell delays the cytoplasmic to nuclear transition of Whi5  
134 until after the RETRN correction (Figure 2C). Because the Whi5 cytoplasm-to-nuclear transition  
135 occurs upon activation of the mitotic exit network (Bean et al., 2006; Costanzo et al., 2004), this  
136 delay demonstrates that the cell prolongs mitosis until the GLM is corrected.

137 In a complementary fashion, we confirmed that GLMs induced a delay in mitotic exit by  
138 following Myo1:GFP localization and abundance. Myo1 is produced at the end of G1 as the cell  
139 begins the formation of a new daughter (Bi and Park, 2012; Weiss, 2012). At the end of mitosis,  
140 following successful partitioning of the genomic material, Myo1 is degraded during cytokinesis  
141 (Figure 2A, Figure 2 – figure supplement 1). By manually aligning normal cell divisions, the  
142 increase of Myo1 levels at the bud neck, and subsequent decrease during cytokinesis, can be  
143 clearly seen (Figure 2D). When the Htb2 levels reach their lowest point, Myo1 levels are at a  
144 maximum, but they immediately begin to fall as the cell eliminates the bud neck during  
145 cytokinesis. In contrast, in divisions where a GLM occurs, the levels of Myo1 continue to  
146 increase even after the Htb2 levels reach their lowest point (Figure 2E). Only following the  
147 RETRN event does Myo1 begin to fall.

148 To determine whether GLMs result from improper spindle attachment and whether  
149 RETRN events are caused by activation of the spindle assembly checkpoint, we deleted the gene  
150 encoding the spindle assembly checkpoint component Mad3 (mammalian BubR1). This failed to  
151 alter the age-related increase in missegregation, and older *mad3Δ* cells had the same  
152 missegregation rates as wild type cells (Figure 2 – figure supplement 2). Taken together, these  
153 data differentiate RETRN events and terminal GLMs from prior observations of nuclear

154 oscillations near the bud neck linked to alignment of the spindle poles between mother and  
 155 daughter(Palmer et al., 1989; Yang et al., 1997; Yeh et al., 2000, 1995). Similarly, nuclear  
 156 excursions where a single spindle-pole entered the daughter, but then returned to the mother has  
 157 been identified in DNA damage checkpoint mutants (Dotiwala et al., 2007); however, when cells  
 158 arrest as a result of the DNA damage response during metaphase, only the nucleolus enters the  
 159 daughter while all chromatin is retained by the mother cell (Witkin et al., 2012). A recent report  
 160 identified segregation of the nucleus and spindle poles into the daughter cell in five aging yeast  
 161 cells (of the 10 observed), which is likely to be the same phenotype detailed here(Neurohr et al.,  
 162 2018). They also identified elevated rates of chromosome I missegregation in old cells (in ten of  
 163 the forty cells observed). In prior studies, mutants that missegregate chromosomes or both  
 164 spindle poles to the daughter cell are unable to correct these events(Finley et al., 2008; Thrower  
 165 et al., 2003; Yeh et al., 2000, 1995); however, the RETRN events seen in aged mother cells  
 166 unambiguously delay mitotic exit and correct these failures by actively transferring chromatin,  
 167 microtubules, and/or spindle poles from the daughter cell to the mother cell.

**Fig 2**

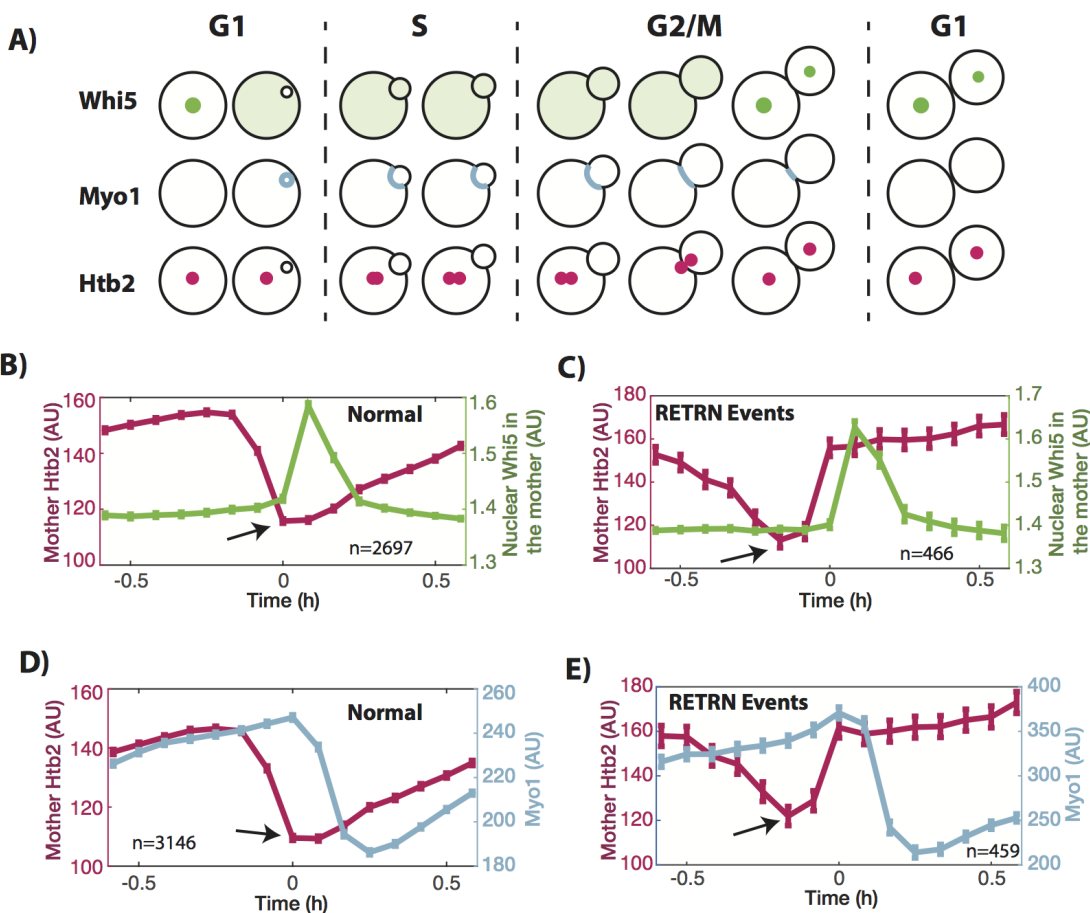

168  
 169 **Fig. 2.** Characterization of missegregation and corrections during the cell cycle. **A)** Schematic illustrating the  
 170 temporal dynamics of the proteins used to characterize missegregation events. Whi5 exits the nucleus to initiate START and  
 171 move the cell into S phase. It re-enters the nucleus at the end of mitosis. Myo1 is produced at the end of G1 and  
 172 localizes to the bud neck until cytokinesis ends mitosis. **B)** Average Htb2 and Whi5 dynamics for cell cycles without  
 173 missegregation events (n=2,697). Whi5 begins to transition from cytoplasmic to nuclear when Htb2 levels reach the  
 174 lowest point as indicated by the arrow. **C)** Average traces from cell cycles with RETRN events. In these cases  
 175 (n=466), the Whi5 cytoplasmic to nuclear transition is delayed until the missegregation is corrected. **D)** Average

176 Htb2 and Myo1 dynamics for cell cycles without missegregations (n=3,146). Myo1 levels begin to fall immediately  
177 after chromosome segregation, as shown by the arrow. E) In cell cycles with a RETRN event (n=459), even after  
178 chromosomes enter the daughter (noted by the arrow), Myo1 levels continue to increase until the missegregation is  
179 corrected, and then cytokinesis begins. N-values indicate the number of cell cycles analyzed, and all error bars are  
180 standard error. Cells are aligned so that time t=0 indicates the beginning of mitotic exit and the M to G1 transition,  
181 as determined by Whi5 and Myo1 dynamics.  
182

183 Changes in nucleosome occupancy have been linked to age-related genomic  
184 instability(Hu et al., 2014), DNA damage(Hauer et al., 2017), and tumorigenesis(Sharma et al.,  
185 2010), and during the course of our studies we observed increasing Htb2 levels at late replicative  
186 ages (Figure 3A, Video 12). Given that prior studies have reported both increasing and  
187 decreasing histone levels with age(Feser et al., 2010; Janssens et al., 2015), we analyzed  
188 expression of two histones tagged with GFP (Hta2, Htb2) in addition to Htb2:mCherry and  
189 confirmed that this end of life increase is a general behavior of histones (Figure 3 – figure  
190 supplement 1). Furthermore, all histones examined showed a dramatic increase in expression  
191 between 5-10 divisions prior to death (Figure 3 – figure supplement 2).

192 We speculated that the elevated histones in aged cells may reflect an expansion of the  
193 rDNA in the form of extrachromosomal rDNA circles (ERCs), which increase dramatically  
194 during aging and have been proposed as a molecular mechanism of aging(Sinclair and Guarente,  
195 1997) and genome instability (Ganley et al., 2009). As a result, rDNA copy number in old cells  
196 has been shown to increase nearly twenty fold (Dang et al., 2009). To test whether histone levels  
197 reflect ERC abundance, we determined the impact of reducing ERC formation by removing the  
198 replication fork block protein Fob1; deletion of *FOB1* reduces rDNA recombination and ERC  
199 abundance(Defossez et al., 1999; Kobayashi et al., 1998; Sinclair and Guarente, 1997) and  
200 significantly extends lifespan (Figure 3 – figure supplement 3). In comparison to wild type cells,  
201 the increase in histone levels with age is attenuated in *fob1Δ* cells (Figure 3B). Furthermore,  
202 although wild-type and *fob1Δ* mother cells stained with DAPI after 16h of growth had  
203 statistically indistinguishable replicative ages (Figure 3C, median RLS=13, p=0.42), wild-type  
204 cells have significantly greater DNA levels (Figure 3D, p=0.0002). The lower DNA and histone  
205 levels in old *fob1Δ* cells relative to age-matched wild-type is consistent with the model that  
206 increasing histone levels are driven by ERC accumulation in aging yeast. If increasing histone  
207 levels reflect ERC levels, then histone levels should act as a biomarker that predicts remaining  
208 lifespan and could be associated with other age-associated failures. Indeed, within cells of the  
209 same replicative age, we determined that histone abundance is negatively correlated with  
210 remaining lifespan, and this correlation becomes stronger as cells age (Figure 3 – figure  
211 supplement 3). Histone levels are less correlated with mortality in *fob1Δ* cells, supporting a  
212 model where slowing ERC production reduces the underlying pathology linking histone  
213 abundance to death.

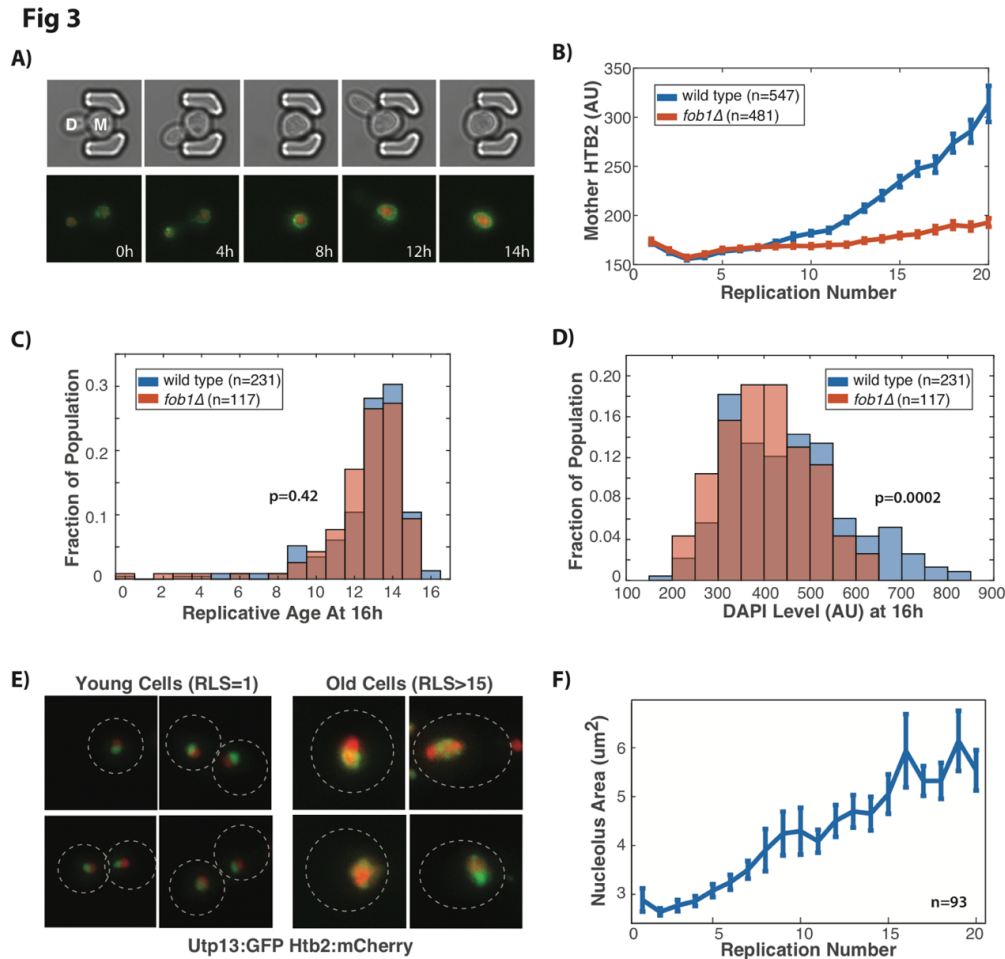

214  
215

216 **Fig. 3.** Age-related rDNA instability impairs Cdc14 release and anaphase entry. **A)** Time course of a single mother  
217 cell expressing Htb2:mCherry and Nup49:GFP shows the increase in histone levels during normal replicative aging,  
218 full movie in Video 12. The mother cell shown here has a replicative age of 16 at the timelapse start and 21 at the  
219 end. **B)** Old wild type cells have significantly greater histone levels compared to young wild type cells and  
220 accumulation of histones during aging is attenuated in cells lacking Fob1 ( $n=481$ ) compared to wild type (wt,  
221  $n=587$ ). Significance of age and genotype ( $p<0.0001$  in both cases) determined by repeated measures ANOVA. This  
222 links rDNA expansion in the form of ERCs with histone accumulation. **C)** Wild-type and *fob1Δ* cells were grown in  
223 the microfluidic device for 16h, and then fixed. At the time of fixation, both strains had similar replicative ages  
224 ( $p=0.42$ , two tailed t-test). **D)** Although both strains had similar replicative ages, the aged wild-type mother cells had  
225 increased DAPI staining levels relative to aged *fob1Δ* cells, indicating an increased level of DNA ( $p=0.0002$ , two  
226 tailed t-test). **E)** In young cells the nucleolus (Utp13:GFP) is adjacent to the genomic DNA (marked by Htb2). In  
227 aged cells, however, ERCs accumulate and are localized to the nucleolus which becomes colocalized with histones  
228 as the nucleolus fragments. Colocalization is particularly evident toward the end of a mother cells life (see Videos  
229 13 and 14). **F)** The size of the nucleolus as measured by segmenting Utp13:GFP increases during replicative aging  
230 ( $n=93$ ,  $p<0.0001$ , Mann-Kendall trend test).

231

232 The rDNA is localized to the nucleolus, a phase separated organelle inside the  
233 nucleus (Lindström et al., 2018). To examine the relationship between histone dynamics, ERCs,  
234 and nucleolar structure, we followed aging mother cells expressing Htb2:mCherry along with a  
235 GFP fusion to the nucleolar protein Utp13. In young cells, the nucleolus appears as a nuclear  
236 site adjacent to the majority of histones, while in old cells, a large quantity of histones is

237 localized within the nucleolus (Figure 3C, Videos 13-14). Furthermore, the size of the nucleolus  
238 increases dramatically as cells age and often becomes fragmented into multiple foci (Figure 3D,  
239 Videos 13-14), further indicating that the excess histones are localized to ERCs in old cells and  
240 confirming earlier work linking ERCs to nucleolar fragmentation (Neurohr et al., 2018; Sinclair  
241 et al., 1997; Sinclair and Guarente, 1997).

242 The protein Cdc14 is also localized to the nucleolus where it functions in the Regulator of  
243 Nucleolar Silencing and Telophase Exit (RENT) complex to silence transcription (Clemente-  
244 Blanco et al., 2011; Shou et al., 1999) and ensure proper segregation of chromosomes (D'Amours  
245 et al., 2004; Rock and Amon, 2009; Sullivan et al., 2004). Recently Cdc14 was identified as the  
246 limiting step in anaphase, and separately it was observed that compaction of rDNA within the  
247 nucleolus interfered with proper release of Cdc14 from the nucleolus (de los Santos-Velázquez et  
248 al., 2017; Roccuzzo et al., 2015). Given the increased nucleolar size and the increased nucleolar  
249 histone levels during aging, we hypothesized that this might affect proper Cdc14 release from the  
250 nucleolus during anaphase. To test this, we observed both Cdc14:GFP and Htb2:mCherry  
251 dynamics in individual cells, and compared normal cell cycles with cell cycles where GLMs  
252 occurred. Cdc14 exit from the nucleolus is controlled in two stages, first by the CDC Fourteen  
253 Early Anaphase Release (FEAR) network and then the Mitotic Exit Network (MEN) (Rock and  
254 Amon, 2009). By averaging the dynamics of cell cycles that behave normally, it is clear that  
255 Cdc14 begins to exit the nucleolus prior to division of genomic material between mother and  
256 daughter cells (Figure 4A, Video 15). In cell cycles that experience GLMs, however, Cdc14  
257 remains localized to the nucleolus but is released immediately preceding a RETRN event (Figure  
258 4B, Video 15). This agrees with prior work showing that Cdc14 release during anaphase is  
259 required to generate pulling forces within the mother to counteract those in the daughter (Ross  
260 and Cohen-Fix, 2004).

261 Cdc14 is specifically required for condensation and segregation of repetitive DNA  
262 sequences including the rDNA and telomeres (D'Amours et al., 2004; Sullivan et al., 2004). In  
263 order to further explore the consequences of failed Cdc14 release on anaphase dynamics during  
264 GLM events, we directly observed Chromosome XII by targeting a LacI:GFP reporter to LacO  
265 sites engineered on Chr XII (Ide et al., 2010). During GLMs where the majority of DNA enters  
266 the daughter cell, both Chr XII chromatids remain behind in mother cell (Figure 4C, Video 16-  
267 17). Furthermore, during these GLMs, the Chr XII sister chromatids appear as a single point,  
268 only separating into two distinct foci following a RETRN event (Figure 4C, Video 16-17). This  
269 suggests that delayed Cdc14 activation prevents separation of the rDNA and results in improper  
270 condensation and segregation of Chr XII. During this process, as Chr XII remains localized to  
271 the nucleolus in the mother cell, the remaining genomic content missegregates to the daughter.  
272 We confirmed that this behavior is unique to Chr XII by imaging Chr IV and V during GLMs.  
273 Both copies of Chr IV and Chr V are missegregated to the daughter cells with the rest of the  
274 chromatin during GLMs (Figure 4D,E, Videos 18-19). Thus, we propose that age-associated  
275 expansion of the rDNA and histone depletion lead to dysregulation of Cdc14 during the  
276 metaphase to anaphase transition which results in improper genomic segregation. In both  
277 terminal GLMs and RETRN events, Cdc14 eventually exits the nucleolus to trigger anaphase  
278 (Figure 4 – figure supplement 1).



**Fig 4**

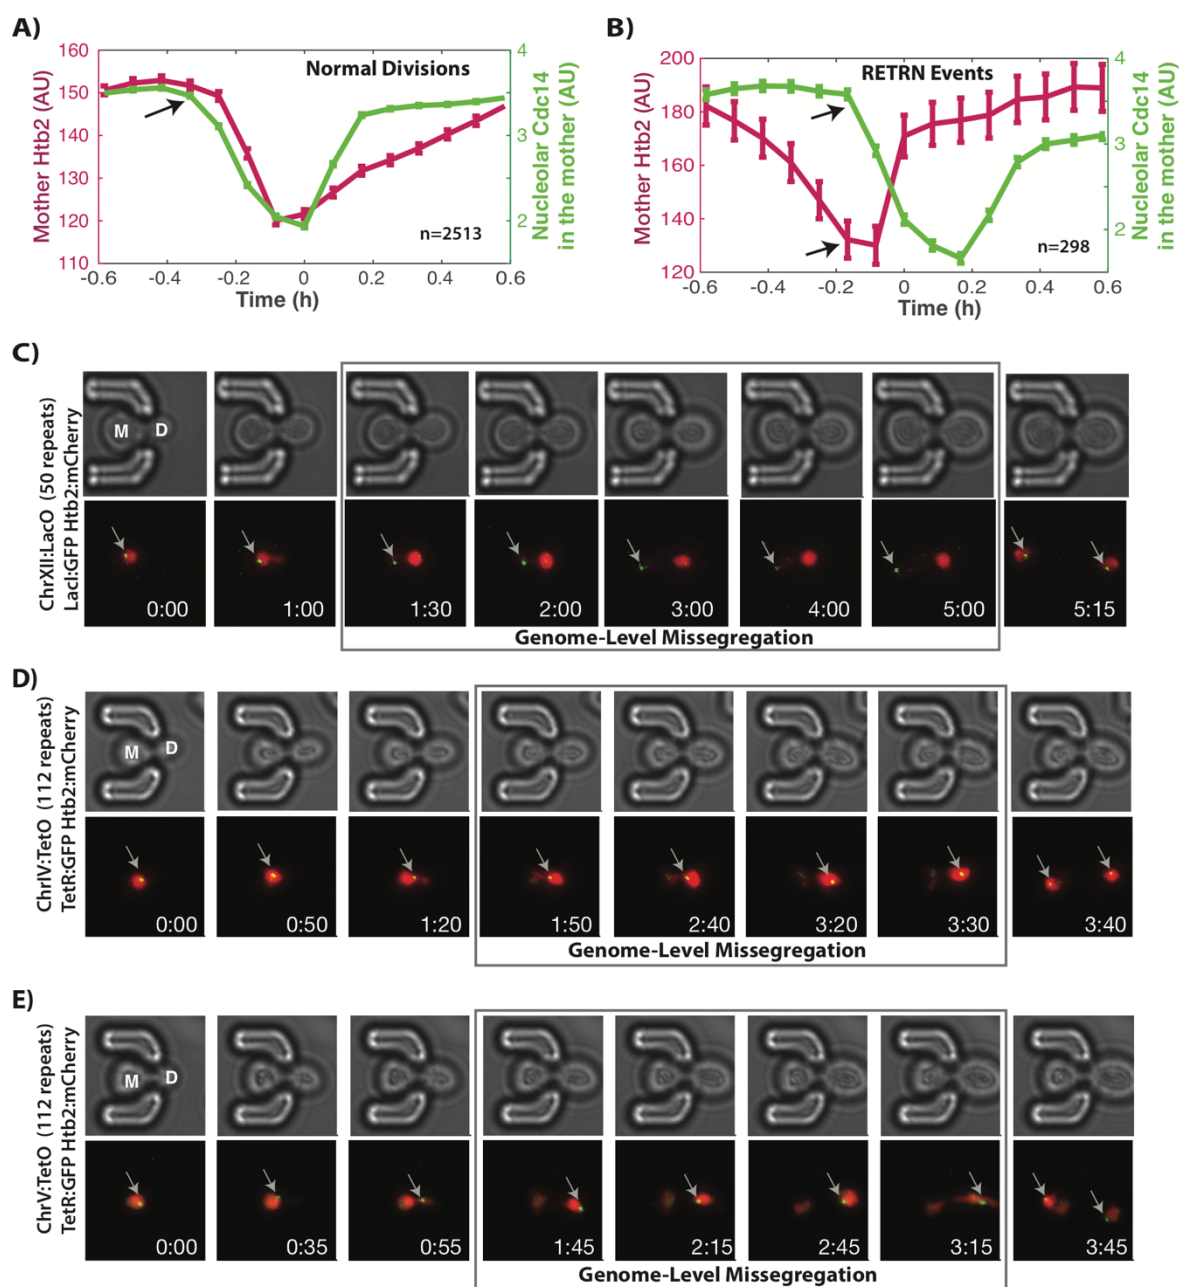

279  
 280 **Figure 4.** Altered Cdc14 dynamics during aging disrupts segregation of rDNA containing Chromosome XII. **A)**  
 281 Dynamics of Cdc14 and Htb2 in mother cells during normal divisions (n=2513). As the cell enters mitosis, Cdc14  
 282 leaves the nucleolus which triggers anaphase (indicated by the arrow). **B)** Dynamics of Cdc14 and Htb2 in mother  
 283 cells during RETRN events (n=298). Although genomic content has left the mother and entered the daughter, Cdc14  
 284 is still localized to the nucleolus. Shortly following Cdc14 release from the nucleolus (indicated by the arrows), the  
 285 cells experience a RETRN event. **C)** Direct observation of Chr XII using LacI:GFP and LacO repeats on Chr XII.  
 286 When the cell experiences a missegregation event, both chromatids of Chr XII remain behind in the mother until the  
 287 RETRN event. After this, a single green dot can be seen in both mother and daughter cells. Mother cell replicative  
 288 age equals 8 at the beginning of this timelapse. **D)** Direct observation of Chr IV using TetR:GFP and TetO repeats  
 289 on Chr IV. When the cell experiences a GLM, both chromatids of Chr IV move to the daughter along with the  
 290 majority of the chromatin. Following a RETRN event, single green dot can be seen in both mother and daughter

291 cells. Mother cell replicative age equals 5 at the beginning of this timelapse. **E)** Direct observation of Chr V using  
292 TetR:GFP and TetO repeats on Chr V. When the cell experiences a GLM, both chromatids of Chr V move to the  
293 daughter along with the majority of the chromatin. Following a RETRN event, single green dot can be seen in both  
294 mother and daughter cells. Mother cell replicative age equals 19 at the beginning of this timelapse. The gray arrows  
295 mark the location of the labelled chromosomes. Times are indicated in hours:mins. In all panels, n-values report the  
296 number of individual cells analyzed.

297  
298 During mitosis, cells must remove and then replace nucleosomes on each DNA strand.  
299 Because all replicating DNA pulls histones from a common pool, a mismatch between local  
300 histone supply and demand could lead to gaps in nucleosome occupancy, which have been  
301 previously observed in aged cells(Hu et al., 2014). We hypothesized that expansion of the rDNA  
302 due to increasing ERC levels during aging elevates mother cell demand for histones, which is  
303 only partially compensated for by the observed increase in histone expression. By this model,  
304 histone demand should be lower in old *fob1Δ* cells compared to age-matched wild-type cells (due  
305 to fewer ERCs), which should result in a reduced probability of GLMs. Observations of GLMs  
306 in a *fob1Δ* mutant support this model (Figure 5A). In particular, *fob1Δ* and wild-type cells  
307 diverge most dramatically following replicative age 10 (Figure 5A), when the wild-type cells  
308 begin to increase histone levels (Figure 3B).

309 To directly test the mechanistic link between histone competition and GLMs, we  
310 genetically manipulated the supply of histones (Figure 5B, Figure 5 – figure supplement 1). To  
311 increase histone levels, we first removed Hpc2, a component of the HIR complex which  
312 represses histone transcription(Green et al., 2005). Deletion of *HPC2* results in reduced  
313 frequency of GLMs in aging cells (Figure 5B). Likewise, deletion of *TOM1*, which encodes a  
314 factor required for degradation of excess histones(Singh et al., 2009), also reduced GLMs  
315 (Figure 5B). To reduce histone abundance, we deleted *SPT21*, which encodes a protein that  
316 positively regulates histone expression(Dollard et al., 1994; Kurat et al., 2014) and whose loss  
317 has been previously shown to reduce histone levels and increase rDNA instability(Eriksson et al.,  
318 2012; Kobayashi and Sasaki, 2017). In contrast to deletion of either *HPC2* or *TOM1*, deletion of  
319 *SPT21* caused increased frequency of GLMs in aging mother cells. When averaged over the  
320 entire lifespan, *spt21Δ* cells experienced significantly more GLMs than wild-type cells, while  
321 *hpc2Δ* and *tom1Δ* cells had significantly fewer events (Figure 5C). These observations  
322 demonstrate that altering histone abundance in aging cells is sufficient to modulate the frequency  
323 of GLM events both upward and downward, and support a model whereby rDNA expansion  
324 causes increasing competition for a common histone pool in aging cells which drives the  
325 dramatic increase in GLMs during aging (Figure 5D).

**Fig 5**

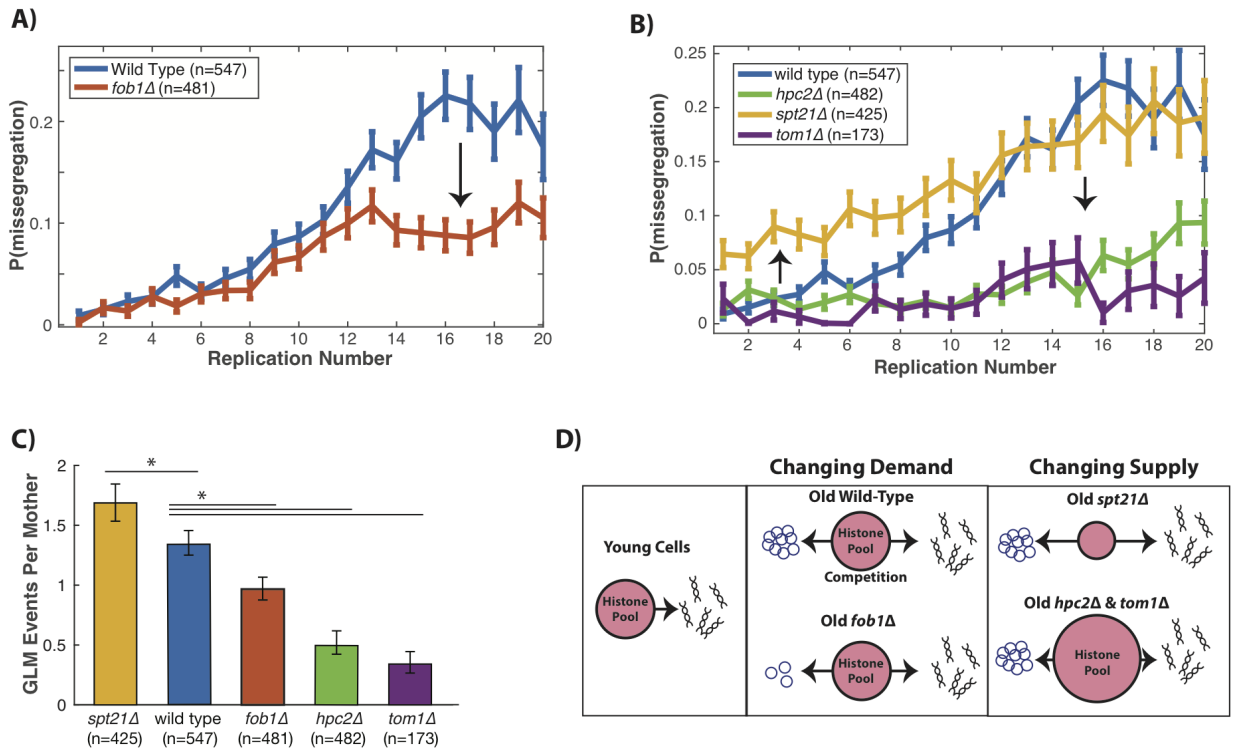

326  
327  
328  
329  
330  
331  
332  
333  
334  
335  
336  
337  
338  
339

**Figure 5.** Genomic missegregations increase with age as a result of competition for histones. **A)** Deleting *FOBI* reduces the accumulation of ERCs with age, and also reduces the probability that cells will experience a missegregation event, shown as P(missegregation) at different ages. **B)** Increasing histone supply (*hpc2Δ* & *tom1Δ*) reduces the fraction of cells that have missegregation events, while reducing histone supply (*spt21Δ*) increases the fraction of cells with missegregation events. Error bars are standard error. N-values report the number of cells. **C)** The mean number of genome level missegregations (GLM) events per mother cell by replicative age twenty. Error bars are 95% confidence intervals generated by bootstrapping with replacement. (\*) Indicates samples with confidence intervals that do not overlap with wild-type. **D)** In young cells the common pool of histones is available for genomic DNA, but as cells age the demand for histones increases as ERCs compete with genomic DNA for the free pool of histones. Old *fob1Δ* cells have fewer ERCs which lowers the competition for histones. By increasing the common histone supply (*hpc2Δ* and *tom1Δ*) competition between genomic DNA and ERCs is reduced and the missegregation rate is reduced.

340 Because function declines in many different and subtle ways during aging, catastrophic  
341 failures and homeostatic systems like the those uncovered here may only be detected in aged  
342 organisms. Imaging of individual yeast cells through microfluidic trapping allowed us to observe  
343 GLMs that occur in most mother cells at some point during their lives. These events are  
344 exceedingly rare in young cells, are actively repaired through transient arrest of the cell cycle,  
345 and likely result from insufficient histone availability due to expansion of the nuclear genome via  
346 accumulation of rDNA. The rDNA has been linked to genomic instability in yeast(Ganley et al.,  
347 2009; Ide et al., 2010; Saka et al., 2013) and within cancer cell lines(Xu et al., 2017), and  
348 nucleolar size is anti-correlated with lifespan across organisms(Tiku et al., 2016). Nucleolar  
349 structure has also been linked to cancer pathogenesis(Lindström et al., 2018). Given the ubiquity  
350 of aneuploidy in age-related human cancers(Sansregret and Swanton, 2017), we speculate that  
351 mechanisms for responding to mitotic failures may be important to cope with age-associated

352 genomic instability in multicellular eukaryotes. Interestingly, although humans have only five  
353 acrocentric chromosomes with rDNA repeats, these are far more likely to result in developmental  
354 trisomy than other chromosomes (Nagaoka et al., 2012). Whether the mechanisms accounting for  
355 age-related increases in genomic instability uncovered here, and the RETRN process to repair  
356 these events, are conserved in higher eukaryotes requires further investigation. Such research  
357 into the behavior of natural cellular processes during aging could provide insights into age-  
358 related pathology and uncover potential targets for intervention.

359

360 **Acknowledgements:** We would particularly like to thank S. Biggins, B. Brewer and M.  
361 Raghuraman for constructive discussions. We also thank L. Veenhoff and Kaeberlein lab  
362 members for feedback and advice. Strains YSI129, AMY914 and AMY1081 were generous gifts  
363 from Jessica Tyler and Adele Marston. This work was supported by NIH grants T32AG000057,  
364 R01AG056359, and P30AG013280.

365

## 366 **References**

- 367 Bakker E. 2016. Quantitative fluorescence microscopy methods for studying transcription with  
368 application to the yeast GAL1 promoter. The University of Edinburgh.
- 369 Bakker E, Swain PS, Crane MM. 2017. Morphologically constrained and data informed cell segmentation  
370 of budding yeast. *Bioinformatics*. doi:10.1093/bioinformatics/btx550
- 371 Beach RR, Ricci-Tam C, Brennan CM, Moomau CA, Hsu P-H, Hua B, Silberman RE, Springer M, Amon  
372 A. 2017. Aneuploidy Causes Non-genetic Individuality. *Cell* **169**:229–242.e21.
- 373 Bean JM, Siggia ED, Cross FR. 2006. Coherence and Timing of Cell Cycle Start Examined at Single-Cell  
374 Resolution. *Mol Cell* **21**:3–14.
- 375 Bi E, Park H-O. 2012. Cell Polarization and Cytokinesis in Budding Yeast. *Genetics* **191**:347–387.
- 376 Cai L, Dalal CK, Elowitz MB. 2008. Frequency-modulated nuclear localization bursts coordinate gene  
377 regulation. *Nature* **455**:485–490.
- 378 Charvin G, Oikonomou C, Siggia ED, Cross FR. 2010. Origin of irreversibility of cell cycle start in  
379 budding yeast. *PLoS Biol* **8**. doi:10.1371/journal.pbio.1000284
- 380 Clemente-Blanco A, Sen N, Mayan-Santos M, Sacristán MP, Graham B, Jarmuz A, Giess A, Webb E,  
381 Game L, Eick D, Bueno A, Merckenschlager M, Aragón L. 2011. Cdc14 phosphatase promotes  
382 segregation of telomeres through repression of RNA polymerase II transcription. *Nat Cell Biol*  
383 **13**:1450–1456.
- 384 Costanzo M, Nishikawa JL, Tang X, Millman JS, Schub O, Breitkreuz K, Dewar D, Rupes I, Andrews B,  
385 Tyers M. 2004. CDK activity antagonizes Whi5, an inhibitor of G1/S transcription in yeast. *Cell*  
386 **117**:899–913.
- 387 Crane MM, Clark IBN, Bakker E, Smith S, Swain PS. 2014. A microfluidic system for studying ageing  
388 and dynamic single-cell responses in budding yeast. *PLoS One* **9**:e100042.
- 389 D'Amours D, Stegmeier F, Amon A. 2004. Cdc14 and condensin control the dissolution of cohesin-  
390 independent chromosome linkages at repeated DNA. *Cell* **117**:455–469.
- 391 Dang W, Steffen KK, Perry R, Dorsey JA, Johnson FB, Shilatifard A, Kaeberlein M, Kennedy BK,  
392 Berger SL. 2009. Histone H4 lysine 16 acetylation regulates cellular lifespan. *Nature* **459**:802–807.
- 393 Defossez PA, Prusty R, Kaeberlein M, Lin SJ, Ferrigno P, Silver PA, Keil RL, Guarente L. 1999.  
394 Elimination of replication block protein Fob1 extends the life span of yeast mother cells. *Mol Cell*  
395 **3**:447–455.
- 396 de los Santos-Velázquez AI, de Oya IG, Manzano-López J, Monje-Casas F. 2017. Late rDNA  
397 Condensation Ensures Timely Cdc14 Release and Coordination of Mitotic Exit Signaling with  
398 Nucleolar Segregation. *Curr Biol* **27**:3248–3263.e5.
- 399 Di Talia S, Skotheim JM, Bean JM, Siggia ED, Cross FR. 2007. The effects of molecular noise and size

- 400 control on variability in the budding yeast cell cycle. *Nature* **448**:947–951.
- 401 Dollard C, Ricupero-Hovasse SL, Natsoulis G, Boeke JD, Winston F. 1994. SPT10 and SPT21 are  
402 required for transcription of particular histone genes in *Saccharomyces cerevisiae*. *Mol Cell Biol*  
403 **14**:5223–5228.
- 404 Dotiwala F, Haase J, Arbel-Eden A, Bloom K, Haber JE. 2007. The yeast DNA damage checkpoint  
405 proteins control a cytoplasmic response to DNA damage. *Proc Natl Acad Sci U S A* **104**:11358–  
406 11363.
- 407 Eriksson PR, Ganguli D, Nagarajavel V, Clark DJ. 2012. Regulation of histone gene expression in  
408 budding yeast. *Genetics* **191**:7–20.
- 409 Fernius J, Marston AL. 2009. Establishment of Cohesion at the Pericentromere by the Ctf19 Kinetochore  
410 Subcomplex and the Replication Fork-Associated Factor, Csm3. *PLoS Genet* **5**:e1000629.
- 411 Feser J, Truong D, Das C, Carson JJ, Kieft J, Harkness T, Tyler JK. 2010. Elevated histone expression  
412 promotes life span extension. *Mol Cell* **39**:724–735.
- 413 Finley KR, Bouchonville KJ, Quick A, Berman J. 2008. Dynein-dependent nuclear dynamics affect  
414 morphogenesis in *Candida albicans* by means of the Bub2p spindle checkpoint. *J Cell Sci* **121**:466–  
415 476.
- 416 Flach J, Bakker ST, Mohrin M, Conroy PC, Pietras EM, Reynaud D, Alvarez S, Diolaiti ME, Ugarte F,  
417 Forsberg EC, Le Beau MM, Stohr BA, Méndez J, Morrison CG, Passequé E. 2014. Replication  
418 stress is a potent driver of functional decline in ageing haematopoietic stem cells. *Nature* **512**:198–  
419 202.
- 420 Ganley ARD, Ide S, Saka K, Kobayashi T. 2009. The Effect of Replication Initiation on Gene  
421 Amplification in the rDNA and Its Relationship to Aging. *Mol Cell* **35**:683–693.
- 422 Gordon DJ, Resio B, Pellman D. 2012. Causes and consequences of aneuploidy in cancer. *Nat Rev Genet*  
423 **13**:189–203.
- 424 Granados AA, Crane MM, Montano-Gutierrez LF, Tanaka RJ, Voliotis M, Swain PS. 2017. Distributing  
425 tasks via multiple input pathways increases cellular survival in stress. *Elife* **6**.  
426 doi:10.7554/eLife.21415
- 427 Green EM, Antczak AJ, Bailey AO, Franco AA, Wu KJ, Yates JR 3rd, Kaufman PD. 2005. Replication-  
428 independent histone deposition by the HIR complex and Asf1. *Curr Biol* **15**:2044–2049.
- 429 Hanahan D, Weinberg RA. 2011. Hallmarks of cancer: the next generation. *Cell* **144**:646–674.
- 430 Hauer MH, Seeber A, Singh V, Thierry R, Sack R, Amitai A, Kryzhanovska M, Eglinger J, Holcman D,  
431 Owen-Hughes T, Gasser SM. 2017. Histone degradation in response to DNA damage enhances  
432 chromatin dynamics and recombination rates. *Nat Struct Mol Biol* **24**:99–107.
- 433 Henderson KA, Hughes AL, Gottschling DE. 2014. Mother-daughter asymmetry of pH underlies aging  
434 and rejuvenation in yeast. *Elife* **3**:e03504.
- 435 Huh W, Falvo JV, Gerke LC, Carroll AS, Howson RW, Weissman JS, O’Shea EK. 2003. Global analysis  
436 of protein localization in budding yeast. *Nature* **425**:686–691.
- 437 Hu Z, Chen K, Xia Z, Chavez M, Pal S, Seol JH, Chen CC, Li W, Tyler JK. 2014. Nucleosome loss leads  
438 to global transcriptional up-regulation and genomic instability during yeast aging. *Genes and*  
439 *Development* **28**:396–408.
- 440 Ide S, Miyazaki T, Maki H, Kobayashi T. 2010. Abundance of ribosomal RNA gene copies maintains  
441 genome integrity. *Science* **327**:693–696.
- 442 Janssens GE, Meinema AC, González J, Wolters JC, Schmidt A, Guryev V, Bischoff R, Wit EC,  
443 Veenhoff LM, Heinemann M. 2015. Protein biogenesis machinery is a driver of replicative aging in  
444 yeast. *Elife* **4**:e08527.
- 445 Jorgensen P, Edgington NP, Schneider BL, Rupes I, Tyers M, Futcher B. 2007. The size of the nucleus  
446 increases as yeast cells grow. *Mol Biol Cell* **18**:3523–3532.
- 447 Kobayashi T, Heck DJ, Nomura M, Horiuchi T. 1998. Expansion and contraction of ribosomal DNA  
448 repeats in *Saccharomyces cerevisiae*: requirement of replication fork blocking (Fob1) protein and the  
449 role of RNA polymerase I. *Genes Dev* **12**:3821–3830.

- 450 Kobayashi T, Sasaki M. 2017. Ribosomal DNA stability is supported by many “buffer genes”-  
451 introduction to the Yeast rDNA Stability Database. *FEMS Yeast Res* **17**. doi:10.1093/femsyr/fox001  
452 Kruegel U, Robison B, Dange T, Kahlert G, Delaney JR, Kotireddy S, Tsuchiya M, Tsuchiyama S,  
453 Murakami CJ, Schleit J, Sutphin G, Carr D, Tar K, Dittmar G, Kaeberlein M, Kennedy BK, Schmidt  
454 M. 2011. Elevated proteasome capacity extends replicative lifespan in *Saccharomyces cerevisiae*.  
455 *PLoS Genet* **7**. doi:10.1371/journal.pgen.1002253  
456 Kurat CF, Lambert J-P, Petschnigg J, Friesen H, Pawson T, Rosebrock A, Gingras A-C, Fillingham J,  
457 Andrews B. 2014. Cell cycle-regulated oscillator coordinates core histone gene transcription through  
458 histone acetylation. *Proc Natl Acad Sci U S A* **111**:14124–14129.  
459 Lindström MS, Jurada D, Bursac S, Orsolich I, Bartek J, Volarevic S. 2018. Nucleolus as an emerging hub  
460 in maintenance of genome stability and cancer pathogenesis. *Oncogene*. doi:10.1038/s41388-017-  
461 0121-z  
462 London N, Biggins S. 2014. Signalling dynamics in the spindle checkpoint response. *Nat Rev Mol Cell*  
463 *Biol* **15**:736.  
464 Maciejowski J, Li Y, Bosco N, Campbell PJ, De Lange T. 2015. Chromothripsis and Kataegis Induced by  
465 Telomere Crisis. *Cell* **163**:1641–1654.  
466 McCormick MA, Delaney JR, Tsuchiya M, Tsuchiyama S, Shemorry A, Sim S, Chou AC-Z, Ahmed U,  
467 Carr D, Murakami CJ, Schleit J, Sutphin GL, Wasko BM, Bennett CF, Wang AM, Olsen B, Beyer  
468 RP, Bammler TK, Prunkard D, Johnson SC, Pennypacker JK, An E, Anies A, Castanza AS, Choi E,  
469 Dang N, Enerio S, Fletcher M, Fox L, Goswami S, Higgins SA, Holmberg MA, Hu D, Hui J, Jelic  
470 M, Jeong K-S, Johnston E, Kerr EO, Kim J, Kim D, Kirkland K, Klum S, Kotireddy S, Liao E, Lim  
471 M, Lin MS, Lo WC, Lockshon D, Miller HA, Moller RM, Muller B, Oakes J, Pak DN, Peng ZJ,  
472 Pham KM, Pollard TG, Pradeep P, Pruett D, Rai D, Robison B, Rodriguez AA, Ros B, Sage M,  
473 Singh MK, Smith ED, Snead K, Solanky A, Spector BL, Steffen KK, Tchao BN, Ting MK, Vander  
474 Wende H, Wang D, Welton KL, Westman EA, Brem RB, Liu X-G, Suh Y, Zhou Z, Kaeberlein M,  
475 Kennedy BK. 2015. A Comprehensive Analysis of Replicative Lifespan in 4,698 Single-Gene  
476 Deletion Strains Uncovers Conserved Mechanisms of Aging. *Cell Metab* **22**:895–906.  
477 Nagaoka SI, Hassold TJ, Hunt PA. 2012. Human aneuploidy: mechanisms and new insights into an age-  
478 old problem. *Nat Rev Genet* **13**:493–504.  
479 Neurohr GE, Terry RL, Sandikci A, Zou K, Li H, Amon A. 2018. Deregulation of the G1/S-phase  
480 transition is the proximal cause of mortality in old yeast mother cells. *Genes Dev*.  
481 doi:10.1101/gad.312140.118  
482 Otsu N. 1979. A Threshold Selection Method from Gray-Level Histograms. *IEEE Trans Syst Man Cybern*  
483 **9**:62–66.  
484 Palmer RE, Koval M, Koshland D. 1989. The dynamics of chromosome movement in the budding yeast  
485 *Saccharomyces cerevisiae*. *J Cell Biol* **109**:3355–3366.  
486 Rocuzzo M, Visintin C, Tili F, Visintin R. 2015. FEAR-mediated activation of Cdc14 is the limiting step  
487 for spindle elongation and anaphase progression. *Nat Cell Biol* **17**:251–261.  
488 Rock JM, Amon A. 2009. The FEAR network. *Curr Biol* **19**:R1063–8.  
489 Ross KE, Cohen-Fix O. 2004. A role for the FEAR pathway in nuclear positioning during anaphase. *Dev*  
490 *Cell* **6**:729–735.  
491 Saka K, Ide S, Ganley ARD, Kobayashi T. 2013. Cellular senescence in yeast is regulated by rDNA  
492 noncoding transcription. *Curr Biol* **23**:1794–1798.  
493 Sansregret L, Swanton C. 2017. The Role of Aneuploidy in Cancer Evolution. *Cold Spring Harb Perspect*  
494 *Med* **7**. doi:10.1101/cshperspect.a028373  
495 Santaguida S, Amon A. 2015. Short- and long-term effects of chromosome mis-segregation and  
496 aneuploidy. *Nat Rev Mol Cell Biol* **16**:473–485.  
497 Shaner NC, Steinbach PA, Tsien RY. 2005. A guide to choosing fluorescent proteins. *Nat Methods*  
498 **2**:905–909.  
499 Sharma S, Kelly TK, Jones PA. 2010. Epigenetics in cancer. *Carcinogenesis* **31**:27–36.

- 500 Shou W, Seol JH, Shevchenko A, Baskerville C, Moazed D, Chen ZW, Jang J, Shevchenko A,  
501 Charbonneau H, Deshaies RJ. 1999. Exit from mitosis is triggered by Tem1-dependent release of the  
502 protein phosphatase Cdc14 from nucleolar RENT complex. *Cell* **97**:233–244.
- 503 Sinclair DA, Guarente L. 1997. Extrachromosomal rDNA circles--a cause of aging in yeast. *Cell*  
504 **91**:1033–1042.
- 505 Sinclair DA, Mills K, Guarente L. 1997. Accelerated aging and nucleolar fragmentation in yeast *sgs1*  
506 mutants. *Science* **277**:1313–1316.
- 507 Singh RK, Kabbaj M-HM, Paik J, Gunjan A. 2009. Histone levels are regulated by phosphorylation and  
508 ubiquitylation-dependent proteolysis. *Nat Cell Biol* **11**:925–933.
- 509 Sullivan M, Higuchi T, Katis VL, Uhlmann F. 2004. Cdc14 phosphatase induces rDNA condensation and  
510 resolves cohesin-independent cohesion during budding yeast anaphase. *Cell* **117**:471–482.
- 511 Sunshine AB, Ong GT, Nickerson DP, Carr D, Murakami CJ, Wasko BM, Shemorry A, Merz AJ,  
512 Kaeberlein M, Dunham MJ. 2016. Aneuploidy shortens replicative lifespan in *Saccharomyces*  
513 *cerevisiae*. *Aging Cell* **15**:317–324.
- 514 Thrower DA, Stemple J, Yeh E, Bloom K. 2003. Nuclear oscillations and nuclear filament formation  
515 accompany single-strand annealing repair of a dicentric chromosome in *Saccharomyces cerevisiae*. *J*  
516 *Cell Sci* **116**:561–569.
- 517 Tiku V, Jain C, Raz Y, Nakamura S, Heestand B, Liu W, Späth M, Suchiman HED, Müller R-U,  
518 Slagboom PE, Partridge L, Antebi A. 2016. Small nucleoli are a cellular hallmark of longevity. *Nat*  
519 *Commun* **8**:16083.
- 520 Weiss EL. 2012. Mitotic exit and separation of mother and daughter cells. *Genetics* **192**:1165–1202.
- 521 Winzeler EA, Shoemaker DD, Astromoff A, Liang H, Anderson K, Andre B, Bangham R, Benito R,  
522 Boeke JD, Bussey H, Chu AM, Connelly C, Davis K, Dietrich F, Dow SW, El Bakkoury M, Foury  
523 F, Friend SH, Gentalen E, Giaever G, Hegemann JH, Jones T, Laub M, Liao H, Liebundguth N,  
524 Lockhart DJ, Lucau-Danila A, Lussier M, M'Rabet N, Menard P, Mittmann M, Pai C, Rebischung  
525 C, Revuelta JL, Riles L, Roberts CJ, Ross-MacDonald P, Scherens B, Snyder M, Sookhai-Mahadeo  
526 S, Storms RK, Véronneau S, Voet M, Volckaert G, Ward TR, Wysocki R, Yen GS, Yu K,  
527 Zimmermann K, Philippsen P, Johnston M, Davis RW. 1999. Functional Characterization of the *S.*  
528 *cerevisiae* Genome by Gene Deletion and Parallel Analysis. *Science* **285**:901–906.
- 529 Witkin KL, Chong Y, Shao S, Webster MT, Lahiri S, Walters AD, Lee B, Koh JLY, Prinz WA, Andrews  
530 BJ, Cohen-Fix O. 2012. The budding yeast nuclear envelope adjacent to the nucleolus serves as a  
531 membrane sink during mitotic delay. *Curr Biol* **22**:1128–1133.
- 532 Xu B, Li H, Perry JM, Singh VP, Unruh J, Yu Z, Zakari M, McDowell W, Li L, Gerton JL. 2017.  
533 Ribosomal DNA copy number loss and sequence variation in cancer. *PLoS Genet* **13**:e1006771.
- 534 Yang SS, Yeh E, Salmon ED, Bloom K. 1997. Identification of a mid-anaphase checkpoint in budding  
535 yeast. *J Cell Biol* **136**:345–354.
- 536 Yeh E, Skibbens RV, Cheng JW, Salmon ED, Bloom K. 1995. Spindle dynamics and cell cycle  
537 regulation of dynein in the budding yeast, *Saccharomyces cerevisiae*. *J Cell Biol* **130**:687–700.
- 538 Yeh E, Yang C, Chin E, Maddox P, Salmon ED, Lew DJ, Bloom K. 2000. Dynamic positioning of  
539 mitotic spindles in yeast: role of microtubule motors and cortical determinants. *Mol Biol Cell*  
540 **11**:3949–3961.
- 541 Zhang C-Z, Spektor A, Cornils H, Francis JM, Jackson EK, Liu S, Meyerson M, Pellman D. 2015.  
542 Chromothripsis from DNA damage in micronuclei. *Nature* **522**:179–184.

## 544 **Supplementary Materials and Methods**

### 545 Microfluidics

546 Cells were imaged using a PDMS microfluidic flow chamber modified from an earlier design  
547 (Crane et al., 2014) to increase retention over the replicative lifespan of the mother cells. The  
548 microfluidic device was composed of multiple chambers in the same fashion as (Granados et al.,  
549 2017), which allowed individual genotypes to be exposed to identical environments and imaged  
550 in the same experiment while being physically isolated. Cells were loaded according to  
551 previously published methods (Granados et al., 2017). A volumetric flow rate of 3-7  $\mu\text{L}/\text{min}$  per  
552 chamber was used, with the flow rate starting low, and increasing during the experiment to  
553 improve mother cell retention and to ensure that cells do not aggregate, which can clog the  
554 device.

555

### 556 Microscopy

557 Cells were imaged using a Nikon Ti-2000 microscope with a 40X oil immersion objective with a  
558 1.3 NA and using the Nikon Perfect Focus System. An enclosed incubation chamber was used to  
559 maintain a stable 30C environment for the duration of the experiment. Two Aladdin syringe  
560 pumps were used for media flow. An LED illumination system (Excelitas 110-LED) was used to  
561 provide consistent excitation energies, and to minimize the exposure, illumination was triggered  
562 by the camera. Images were acquired using a Hamamatsu Orca Flash 4.0 V2. The microscope  
563 was controlled by custom software written in Matlab® and Micromanager.

564

565 Images were corrected for illumination artifacts in two stages. First, to correct for individual  
566 differences in the pixel biases, 1,000 images were acquired with no illumination, and the  
567 individual pixel means were determined. Second, to correct for flatness of field, a fluorescent  
568 dye was added to a microfluidic device instead of using a slide with dye. Using a slide containing  
569 dye introduces a large amount of out-of-focus light, which results in an underestimation of the  
570 field curvature. In order to compensate for the microfluidic features, 1,000 images were acquired  
571 each with a small offset in the x and y positions. Images were then diluted, and the median value  
572 at each location was used. Thus, for each image, the camera bias for that pixel was subtracted,  
573 and then it was multiplied by a flatness of field correction factor.

574

575 Images were acquired at 5 min intervals for bright-field and fluorescent channels. The  
576 fluorescence excitation power was set to 25% for all imaging except the GFP tagged histones,  
577 where it was set to 12%. Fluorescence and brightfield light was activated during image  
578 acquisition and all other lights in the room were turned off. For bright-field, 3 z-sections were  
579 acquired with 2.5  $\mu\text{m}$  intervals, exposure times of 30 ms and were used for automated  
580 segmentation and tracking. For the fluorescent channels, 3 z-sections were acquired with 1.5  $\mu\text{m}$   
581 spacing. GFP images were acquired using a Chroma ET49002 filter set, and mCherry images  
582 were acquired using a Chroma ET49306. GFP images were acquired using exposure times of  
583 60ms for all proteins except Htb2 and Hta2 which were acquire using a 30ms exposure time.  
584 mCherry images were acquired using a 60 ms exposure time. These imaging conditions were  
585 found to work as a reasonable compromise between the desire for frequent, dense imaging to  
586 enable identification of missegregations and retrograde transport, while also minimizing  
587 phototoxicity. We performed control experiments to verify that these exposure conditions did not  
588 affect the rates of genomic missegregation or replicative lifespan (Figure 1 – figure supplement



589 5). Each strain was imaged in multiple independent experimental runs, each with approximately  
590 equal numbers of cells.

591

#### 592 Data processing and single cell scoring

593 Following data acquisition, cells were identified and tracked using previously published  
594 software(Bakker et al., 2017). This identified the cell outline, and performed initial tracking of  
595 the cells through time. To ensure that only young, healthy cells were assessed, we only used cells  
596 that were identified in the first three hours of the experiment. Birth events for these cells were  
597 then manually scored, and any errors in tracking were corrected. This was all done using the  
598 bright-field images. Birth events were scored by multiple observers who were blinded. Because  
599 individual cells can be lost from traps prior to death, it can be challenging to know whether using  
600 censored (lost) cells is most appropriate. In the supplementary information, all data is presented  
601 with and without censoring. In the main text, plots aligned based on increasing age used all cells  
602 present at that age, even if they were later lost from the device. For plots aligned by death, only  
603 cells that had either died or senesced (failed to initiate a new cell division but did not visibly lose  
604 cell wall integrity during the experiment) were used. Because censoring in lifespan experiments  
605 relies on the assumption that losses are unbiased, we provide replicative lifespan curves both  
606 including and excluding censored cells for all strains. Censoring does not change the  
607 interpretation or statistical outcome of any of the experiments presented here.

608

609 For each cell division, the mean histone levels over that cell cycle were used. For cell cycles that  
610 last more than three hours, only the first three hours were used to determine the histone levels.  
611 This ensured that cells which have a terminal missegregation at end of life do not show an  
612 inaccurately low histone level for the last cell cycle.

613

614 Following manual scoring of birth events, the fluorescent channel containing the histones was  
615 used to observe the missegregation dynamics. To ensure consistent scoring across experiments  
616 and eliminate bias, information about the experiments was masked from the scorer until after the  
617 data was evaluated. Following genome level missegregations, RETRN events were defined as  
618 where the histone fluorescence decreased in the daughter cell while simultaneously increasing in  
619 the mother cell. This prevented any changes in focus or gradual fluorescence increases due to  
620 fluorophore maturation from being inadvertently scored as a RETRN event. RETRN events were  
621 scored at the timepoint that the histones return to the mother cell. During cell cycles where cells  
622 had multiple retrograde events during the same cell cycle, only the final RETRN event was  
623 scored. Events were scored as terminal missegregation events if, prior to a correction, the  
624 daughter cell visibly separated from the mother cell (indicating cytokinesis) or if the mother  
625 died.

626

#### 627 Fluorescence quantification

628 Quantification of the level of protein localized to either the nucleolus (Cdc14) or the nucleus  
629 (Whi5), was done using a measure of how asymmetrically distributed the fluorescent signal was.  
630 Specifically, we used average brightness of the top 2% of pixels, divided by the cell median. By  
631 normalizing to median fluorescence, we corrected for any changes in fluorescence that could  
632 occur as a result of photobleaching. This method has been used previously as an accurate  
633 measure of the fraction of protein that is nuclear localized(Cai et al., 2008; Granados et al.,  
634 2017). For Myo1 quantification, we used the mean fluorescence level along the periphery of the

635 cell as segmented. The nucleolar localized fluorescent protein (Utp13:GFP) was used to segment  
636 the nucleolus and determine the nucleolar size. This was done by calculating a segmentation  
637 threshold using Otsu's threshold(Otsu, 1979) for each cell applied to the maximum projection of  
638 the fluorescent image stack. This approach was found to have good agreement with earlier  
639 estimates of nucleolar size in young cells grown in glucose(Jorgensen et al., 2007).

640

641 Because we are utilizing an epi-fluorescent microscope and as a result of out-of-focus light,  
642 mean fluorescence is not directly linked to protein concentration (Bakker, 2016). Because the  
643 fluorescence levels change dramatically during aging, segmenting out the nucleus to determine  
644 fluorescence levels could introduce significant biases as the cells age. Additionally, taking the  
645 mean fluorescence level could introduce significant errors depending on the segmentation  
646 accuracy. Instead, to normalize for changes, we sum a constant area within each cell. This  
647 prevents segmentation (of either the nucleus or cell) from contributing to the determination of  
648 histone amount. Pixels are sorted from high to low, and the top fraction corresponding to a circle  
649 with diameter of 3.8  $\mu\text{m}$  are used to calculate the mean.

650

### 651 Yeast Strains and Growth

652 The GFP strains were all acquired from the yeast GFP collection (Huh et al., 2003). The  
653 Htb2:mCherry strain was created by mating and sporulation of the strain from (Granados et al.,  
654 2017). This strain was then crossed with the relevant GFP strains (Nup49:GFP, Myo1:GFP,  
655 Tub1:GFP, Spc72:GFP, Cdc14:GFP, Utp13:GFP) or deletion strains (*hpc2 $\Delta$* , *fob1 $\Delta$* , *spt21 $\Delta$* ,  
656 *tom1 $\Delta$* , *mad3 $\Delta$* ) from the deletion collection (Winzeler et al., 1999) and then confirmed by  
657 colony PCR. The LacI-GFP strain with 50 LacO repeats on ChrXII was obtained from (Ide et al.,  
658 2010). The strains containing TetR-GFP and TetO repeats integrated into ChrIV or ChrV were  
659 obtained from (Fernius and Marston, 2009). These were then crossed with the strain containing  
660 Htb2:mCherry. Complete list of strains available in Table S1.

661

662 Prior to each experiment, single colonies were picked into SC media (Sunrise Biosciences) with  
663 2% dextrose. Cells were grown overnight, and then diluted 1:200 in fresh media and grown for  
664 5-6h. Prior to loading into the microfluidic device, 0.5 mL of SC 2% dextrose with 0.5% BSA  
665 was added to each 5 mL culture to prevent the cells from adhering to the PDMS during loading.  
666 During experiments, SC media with 2% dextrose and 0.1% BSA was used, and cells were  
667 imaged for 72h.

668

### 669 Statistical Analysis

670 Error bars in the figures which contained bar plots were generated by bootstrapping with  
671 replacement, and then determining the 95% confidence intervals. Error bars in figures with line  
672 plots are standard error. Statistical significance for lifespan was determined using the log-rank  
673 test. Log-rank test was performed with, and without, censored cells that were lost prior to  
674 senescence or death. To compare distributions (such as numbers of missegregation events over  
675 the lifespan), a two-tailed t-test assuming equal variance was used. Correlations between histones  
676 or missegregation events and remaining replicative lifespan were calculated with the Spearman  
677 correlation using the population of cells alive at each replicative age. Correlation between  
678 Htb2:mCherry levels and DAPI staining were also done using the Spearman correlation.

679

## 680 **Supplementary Text**

### 681 Differences between censored and uncensored survival data

682 Frequently in experiments or clinical studies that involve the generation of survival curves, some  
683 samples will be removed from the population under observation. For example, a patient may  
684 leave a study not because of death, but because they move to a different country. This can be  
685 treated in a relatively straightforward manner statistically including these individuals in the  
686 analysis until the point that they are lost (or censored). This relies on the assumption that there is  
687 no bias in whether a sample is lost or retained. A recurring concern with microfluidic aging  
688 experiments involving yeast is whether there is a bias in how cells are lost or retained. This  
689 appears especially important when the mutation or transgene affects cell morphology or cell  
690 cycle, as this can result in a bias in which cells are lost from the traps. To reduce the likelihood  
691 that our observations were directly affected by loss rates, in the main text we have plotted all  
692 cells that were present at that replicative age for plots from birth. Thus, if a cell was lost at  
693 replicative age 20, it was included in the plots until age 19. In the supplementary materials we  
694 have also repeated every plot, but only using cells that died in the microfluidic device. Given that  
695 this is an altered population distribution and smaller number of cells, these plots are slightly  
696 different, but they do not affect the conclusions. Furthermore, in the plots where cells are aligned  
697 by birth rather than death, we are forced to only use cells that die in the device. For replicative  
698 lifespans shown in the supplementary, we include survival curves with and without censored  
699 cells.

700

### 701 Aligning cells from birth or from death

702 Cells can be aligned either by birth (counting up from replicative age = 0), or by death (counting  
703 back from death). Either processing makes some assumptions about how similar cells are to one  
704 another. If cells are most similar to each other when they are born, aligning by birth makes sense,  
705 and as the replicative age increases, the number of samples decreases because cells are removed  
706 by death or senescence. In contrast, assuming that cells are similar at death implies that the  
707 phenotype of interest is most similar as cells approach death. For example, the average time cells  
708 take to proceed through each cell cycle increases geometrically when cells are aligned by birth,  
709 but exponentially when aligned by death. In the supplementary figures, we show the population  
710 means aligned using both approaches.

711

### 712 Differences between Htb2:mCherry and Hta2:GFP

713 Although both of these strains were found to have similar numbers of missegregation events  
714 during their lifetimes, and similar fractions of these events were corrected (Figure 1 – figure  
715 supplement 4B,C), there are subtle differences between the strains. Most notably, the strain with  
716 Hta2:GFP had what we consider to be a normal lifespan for this background (median RLS= 21  
717 for cells that died/senesced in the device, median RLS=24 including censored cells, Figure 1 –  
718 figure supplement 4D,E). The strain with Htb2:mCherry, however, had a somewhat shorter  
719 lifespan (median RLS = 16 for cells that died/senesced, median RLS=18 including censored  
720 cells, Figure 1 – figure supplement 4D,E). Removing FOB1, however, results in an increase of  
721 the replicative lifespan of this strain by ~30% (Figure 3 – figure supplement 3), which is in line  
722 with results from literature (McCormick et al., 2015). Furthermore, the increase in replicative  
723 lifespan as a result of increased histone transcription has been less thoroughly studied, but our  
724 results are in line with those previously reported by another group (Feser et al., 2010; Kruegel et

725 al., 2011). Thus, although there is an unexpected reduction in lifespan for the Htb2:mCherry  
726 strain, we do not believe that it affects our results.

727  
728 Likewise, as shown in the main text, we determined the correlation between missegregation  
729 events and remaining lifespan at the single cell level. The correlation is between the binary  
730 presence or absence of a missegregation event during a cell cycle and the remaining lifespan.  
731 Strikingly, as shown in Figure 1 – figure supplement 2, for both strains, the correlation between  
732 missegregation events and remaining replicative lifespan is the same for both Htb2:mCherry and  
733 Hta2:GFP. This is in spite of the difference in absolute lifespan between the two strains.

734  
735 Because GFP fluorescence is much more affected than mCherry fluorescence by changing pH  
736 (Shaner et al., 2005), and the pH of the cytoplasm in aging yeast has previously been shown to  
737 increase (Henderson et al., 2014), we chose to perform the majority of the experiments using  
738 mCherry. This ensured that any changes in pH homeostasis during aging would not affect our  
739 measurements of histone levels.

740  
741 GFP Tagged Histones and Correlation with remaining RLS  
742 As discussed in the main text, we imaged GFP tagged histones acquired from the GFP collection  
743 (Hta2, Htb2). This allowed us to determine that the increase in histone levels was a general  
744 aspect of aging physiology, not confined to specific histones. In order to determine whether  
745 histone levels were accurate biomarkers that predicted remaining lifespan, we used the single cell  
746 measurements collected for both strains (Figure 3 – figure supplement 1). At each replicative  
747 age, cells still alive are used to determine the correlation between their remaining replicative  
748 lifespan and the single cell histone levels. Thus, for prediction of remaining lifespan at  
749 replicative age 5, only cells that bud more than 5 times are included. The negative correlation  
750 between histone levels and remaining lifespan is similarly true for the GFP tagged histones  
751 imaged: Hta2, Htb2 (Figure 3 – figure supplement 1A). Furthermore, all histones are similarly  
752 predictive of remaining lifespan, and become increasingly predictive as cells age.

753  
754 To provide a more complete picture of the data acquired, we plotted the GFP mean histone levels  
755 where single cells are aligned based on their replicative ages (Figure 3 – figure supplement 1B).  
756 As the population ages, the underlying distribution changes as cells die and are removed from the  
757 pool. This creates some variability with the increasing replicative age of the population. When  
758 individual cells are aligned by death, the population mean for histone levels at replicative ages  
759 preceding death looks quite different (Figure 3 – figure supplement 1C). By aligning cells by  
760 death, it is clear that histone levels begin to increase around 5-10 replications prior to death.  
761 When including all cells, including those that were lost from the traps, cells expressing GFP  
762 tagged histones have similar replicative lifespans (Figure 3 – figure supplement 1D,E).

763  
764 Single Cell DNA Levels and FOB1  
765 As discussed in the main text, we determined the correlation between histone levels and DNA by  
766 comparing, in individual cells, levels of Htb2:mCherry with levels of DAPI. To do this, mother  
767 cells were aged in the device for 16h, and then fixed with ethanol and stained with DAPI. To  
768 determine whether the accumulation of ERCs with age leads to a detectable increase in DNA  
769 content, we compared DAPI staining of wild-type and *FOB1* $\Delta$ . We acquired age-matched mother  
770 cells by using a multi-chamber device to simultaneously age wild-type and *FOB1* $\Delta$  cells.

771 Comparing mothers that had grown in the device for 16h (median of 13 divisions and thus  
772 middle aged), we confirmed that DNA levels increase in wild-type cells are significantly higher  
773 compared with *fob1Δ*. We confirmed that the deletion of FOB1 decreased DNA content in aging  
774 cells, and not just histone levels. By manually scoring the number of divisions each strain had up  
775 until the point of ethanol fixation, we determined that there was no difference between strains in  
776 the number of daughters (Figure 3C,  $p=0.42$ ). Although the replicative ages for each strain were  
777 statistically indistinguishable, the wild-type strain had a statistically significant increase in the  
778 DAPI staining levels (Figure 3D,  $p=0.0002$ ). Thus, *fob1Δ* cells accumulate both histones and  
779 excess DNA at lower rates compared with wild-type cells. Furthermore, we compared Htb2 and  
780 DAPI levels at the single cell level, and histone levels are highly predictive of DNA content at  
781 the single cell level (Figure 1 – figure supplement 3).

782

### 783 Manipulating histone demand (*fob1Δ*)

784 To provide a more complete picture of how Htb2 levels changed during aging in *fob1Δ* cells  
785 compared with wild-type, we performed the same procedure as with the GFP strains but using  
786 only the cells that die in the device to complement the plots in the main text. These plots look  
787 very similar to the plots using censored cells indicating that censoring doesn't alter the  
788 population distribution. By aligning cells based on the replicative age, and plotting the mean  
789 Htb2:mCherry levels of the population, it is clear that there is a dramatic difference between  
790 wild-type and *fob1Δ* cells in Htb2 levels (Figure 3 – figure supplement 3A). This also reflects the  
791 missegregation rate (Figure 3 – figure supplement 3B). Missegregations are less predictive of  
792 death in *fob1Δ* cells than wild-type cells (Figure 3 – figure supplement 3C). When cells are  
793 aligned by death, as opposed to birth, both wild-type and *fob1Δ* cells experience an increase in  
794 histone levels, although *fob1Δ* cells are attenuated relative to wild-type (Figure 3 – figure  
795 supplement 3D). Because *fob1Δ* cells live longer, it would be reasonable to expect that by the  
796 end-of-life, the missegregation rate is closer between wild-type and *fob1Δ* cells than when  
797 aligned by birth (Figure 3 – figure supplement 3E). Similar to previous reports (Defossez et al.,  
798 1999), we find a significant increase the replicative lifespan of *fob1Δ* cells compared with wild-  
799 type (Figure 3 – figure supplement 3F). Survival curves of only the cells which died in the  
800 device, and thus were used in the analysis, showed similar lifespan differences (Figure 3 – figure  
801 supplement 3G).

802

### 803 Manipulating histone supply (*tom1Δ*, *hpc2Δ* and *spt21Δ*)

804 To provide a more complete picture of how the manipulation of the histone supply affected  
805 lifespan and Htb2 levels, we performed a similar procedure as previously described. Spt21  
806 positively regulates the transcription of all histone genes, and Hpc2 negatively regulates histone  
807 genes. The protein Tom1 is involved in the ubiquitination and degradation of excess histone  
808 proteins. Thus by deleting *HPC2*, we upregulate histone transcription, deleting *SPT21* suppresses  
809 histone transcription and deleting *TOM1* allows excess histone proteins to remain in the cell.  
810 Similar to the figures in the main text, we used only cells that die in the device to plot  
811 missegregation rates aligned by birth (Figure 5 – figure supplement 1A) and by death (Figure 5 –  
812 figure supplement 1B). As previously identified, *hpc2Δ* and *tom1Δ* cells live significantly longer  
813 than wild-type cells (Figure 5 – figure supplement 1C,D). Surprisingly, *spt21Δ* cells do not  
814 appear shorter lived compared to wild-type (Figure 5 – figure supplement 1C,D). These trends  
815 are maintained in survival curves of only cells that die in the device (Figure 5 – figure  
816 supplement 1C).

| Strain Name | Genotype                                                                                                                        | Source               |
|-------------|---------------------------------------------------------------------------------------------------------------------------------|----------------------|
| BY4741      | MATa his3Δ1 leu2Δ0 met15Δ0 ura3Δ0                                                                                               |                      |
| BY4742      | MATα his3Δ1 leu2Δ0 lys2Δ0 ura3Δ0                                                                                                |                      |
| YSI129      | ade2-1 ura3-1 his3-11 trp1-1 leu2-3,112 can1-100 fob1Δ::LEU2 his3-11::GFP-LacI-HIS3 LacO(50)-ADE2:445kb ChXII (110 rDNA copies) | Ide, et al. 2010     |
| AMY914      | MATa ura3 trp1 his3-11 MET-CDC20::URA pURA::tetR-GFP::LEU2 cenIV::tetOx448::URA3                                                | Fernius, et al. 2009 |
| AMY1081     | MATa ade2-1 leu2-3 trp1-1 trp1 his3-11 can1-100 GAL psi+ MET-CDC20::URA pURA::tetR-GFP::LEU2 ura3::tetOx112::URA3               | Fernius, et al. 2009 |
| MC213       | HTB2::mCherry-URA3 his3 leu2 met15 LYS2                                                                                         | this study           |
| MC230       | fob1Δ::KanMX his3 leu2 HTB2::mCherry-URA met15 LYS2                                                                             | this study           |
| MC237       | HTA2::GFP-HIS3 his3 leu2 ura3 met15 LYS2                                                                                        | Yeast GFP Collection |
| MC239       | HTB2::GFP-HIS3 his3 leu2 ura3 met15 LYS2                                                                                        | Yeast GFP Collection |
| MC245       | NUP49::GFP-HIS3 his3 leu2 ura3 met15 LYS2                                                                                       | Yeast GFP Collection |
| MC247       | TUB1::GFP-HIS3 his3 leu2 ura3 met15 LYS2                                                                                        | Yeast GFP Collection |
| MC250       | HTB2::mCherry-URA3 WHI5::GFP-HIS3 leu2 met15 LYS2                                                                               | this study           |
| MC255       | spt21Δ::KanMX his3 leu2 HTB2::mCherry-URA met15 LYS2                                                                            | Yeast KO Collection  |
| MC257       | hpc2Δ::KanMX his3 leu2 HTB2::mCherry-URA met15 LYS2                                                                             | Yeast KO Collection  |
| MC258       | NUP49::GFP-HIS3 his3 leu2 ura3 met15 LYS2 htb2::mCherry-URA                                                                     | this study           |
| MC263       | HTB2::mCherry-URA3 his3 leu2 met15 lys2 hpc2Δ::KanMX                                                                            | this study           |
| MC264       | HTB2::mCherry-URA3 TUB1::GFP-HIS2 leu2 met15 LYS2                                                                               | this study           |
| MC266       | HTB2::mCherry-URA3 his2 leu2 MET15 lys2 spt21Δ::KanMX                                                                           | this study           |
| MC281       | HTB2::mCherry-URA3 his3-11::GFP-LacI-HIS3 RDN1::LacO(50)-ADE2                                                                   | this study           |
| MC349       | mad3Δ::KanMX his3 leu2 htb2::mCherry-URA met15 LYS2                                                                             | this study           |
| MC351       | SPC72::GFP-HIS3 his3 leu2 ura3 met15 LYS2                                                                                       | Yeast GFP Collection |
| MC352       | UTP13::GFP-HIS3 his3 leu2 ura3 met15 LYS2                                                                                       | Yeast GFP Collection |
| MC354       | CDC14::GFP-HIS3 his3 leu2 ura3 met15 LYS2                                                                                       | Yeast GFP Collection |
| MC355       | SPC72::GFP-HIS3 his3 leu2 ura3 met15 LYS2 HTB2:mCherry-URA                                                                      | this study           |
| MC360       | CDC14::GFP-HIS3 his3 leu2 ura3 met15 LYS2 HTB2:mCherry-URA                                                                      | this study           |
| MC364       | UTP13::GFP-HIS3 his3 leu2 ura3 met15 LYS2 HTB2:mCherry-URA                                                                      | this study           |
| MC367       | mad3Δ::KanMX his3 leu2 ura3 met15 LYS2 HTB2:mCherry-URA                                                                         | this study           |
| MC372       | tom1Δ::KanMX his3 leu2 ura3 met15 LYS2 HTB2:mCherry-URA                                                                         | this study           |
| MC394       | ura3 his3-11 pURA::tetR-GFP::LEU2 cenIV::tetOx448::URA3 HTB2:mCherry-URA                                                        | this study           |
| MC395       | leu2-3 his3-11 pURA::tetR-GFP::LEU2 ura3::tetOx112::URA3 HTB2:mCherry-URA                                                       | this study           |

817 **Table S1.** List of all strains and genotypes used in this study.

## 818 Supplementary Figures

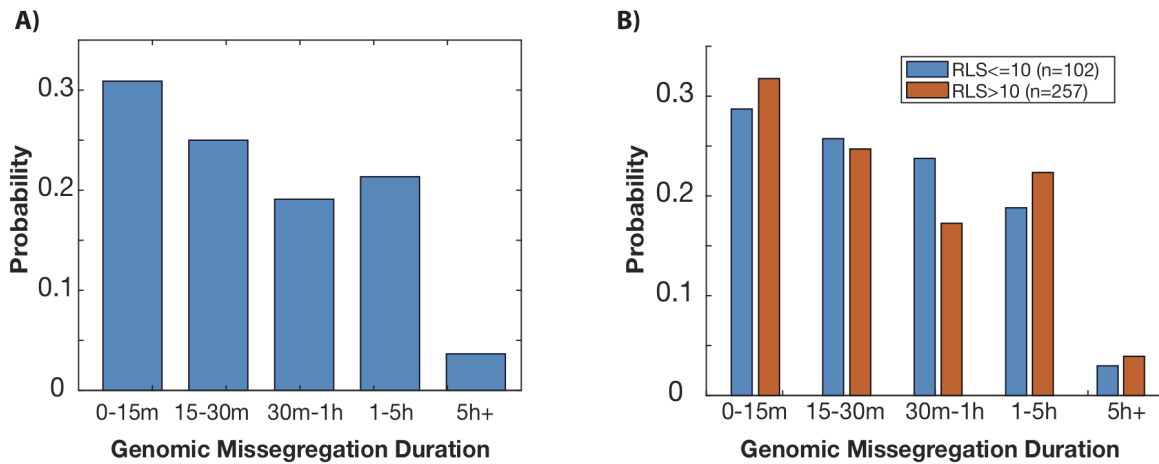

819  
820  
821  
822  
823  
824  
825  
826  
827

**Figure 1 – figure supplement 1. Histogram showing the duration of genomic missegregation events in wild-type cells.** Only events which eventually resulted in a RETRN event are shown, as that provides a clear end of the missegregation event. **A)** Many GLMs are corrected within an hour, but some events can last several hours. This includes GLMs from cells of all replicative ages. **B)** When events are separated based on the age of the mother cell at time of missegregation event, there is no significant difference in the distribution of GLM durations ( $p=0.5$ , two-tailed t-test). N-value are the number of individual missegregation events quantified.

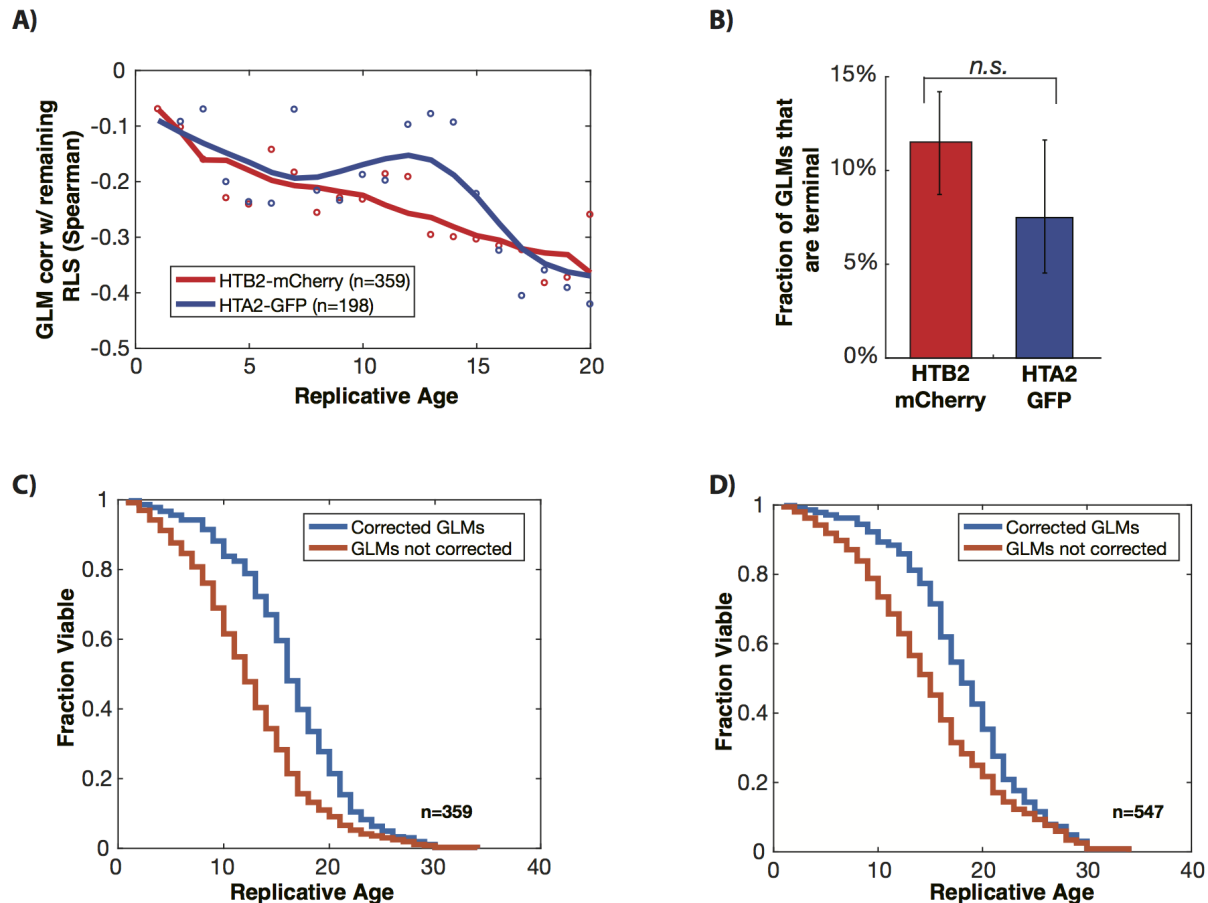

828  
829  
830  
831  
832  
833  
834  
835  
836  
837  
838  
839  
840  
841  
842  
843  
844  
845  
846  
847

**Figure 1 – figure supplement 2. GLMs are predictive of death, and most GLMs are corrected by RETRN events.** **A)** At the single cell level, genome level missegregation (GLM) events are correlated with impending mortality (anti-correlated with remaining lifespan, as shown), and become more predictive (more strongly anti-correlated, as shown) with increasing replicative age. The strength of the anti-correlation with age is similar regardless of the fluorophore used or histone protein tagged. Dots show correlation between an individual histone and the remaining lifespan at that replicative age. To show trends, these have been smoothed with a moving average (solid line). **B)** When a GLM occurs, approximately 90% of the time it is corrected through a RETRN event, and the remainder of the time it becomes a terminal missegregation. Error bars are 95% confidence intervals generated by bootstrapping with replacement. N-values were individual cells, and only cells that died or senesced in the device were used for both plots. **C)** RETRN events significantly increase replicative life span. Comparison of experimentally observed replicative lifespan (corrected GLMs) to expected lifespan if all GLMs were terminal (not corrected) for wild type cells. To generate the GLM not corrected lifespan, the first GLM event for each mother cell was assumed to be terminal, and the lifespan was truncated accordingly. This plot uses only cells that die in the device. RETRN events increase median lifespan by 33% ( $p < 0.0001$ ). **D)** Same is in panel S2C, but including cells that are censored. The increase in median lifespan by RETRN events is 29% ( $p < 0.0001$ ).



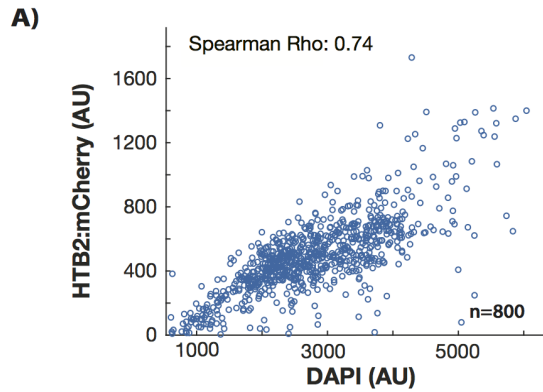

848

849 **Figure 1 – figure supplement 3. Htb2 levels are predictive of DNA content at the single cell**  
850 **level.** Wild-type cells were grown in the microfluidic device for 16h, and then fixed. Cells had a  
851 median replicative age of 13 divisions. The level of Htb2:mCherry is highly correlated  
852 ( $p < 0.0001$ ) with the level of DAPI staining at the single cell level in individual cells. This is true  
853 across the entire range of Htb2:mCherry fluorescence, as even cells that have the highest  
854 Htb2:mCherry levels have correspondingly high DAPI staining. N=800 individual mother cells.

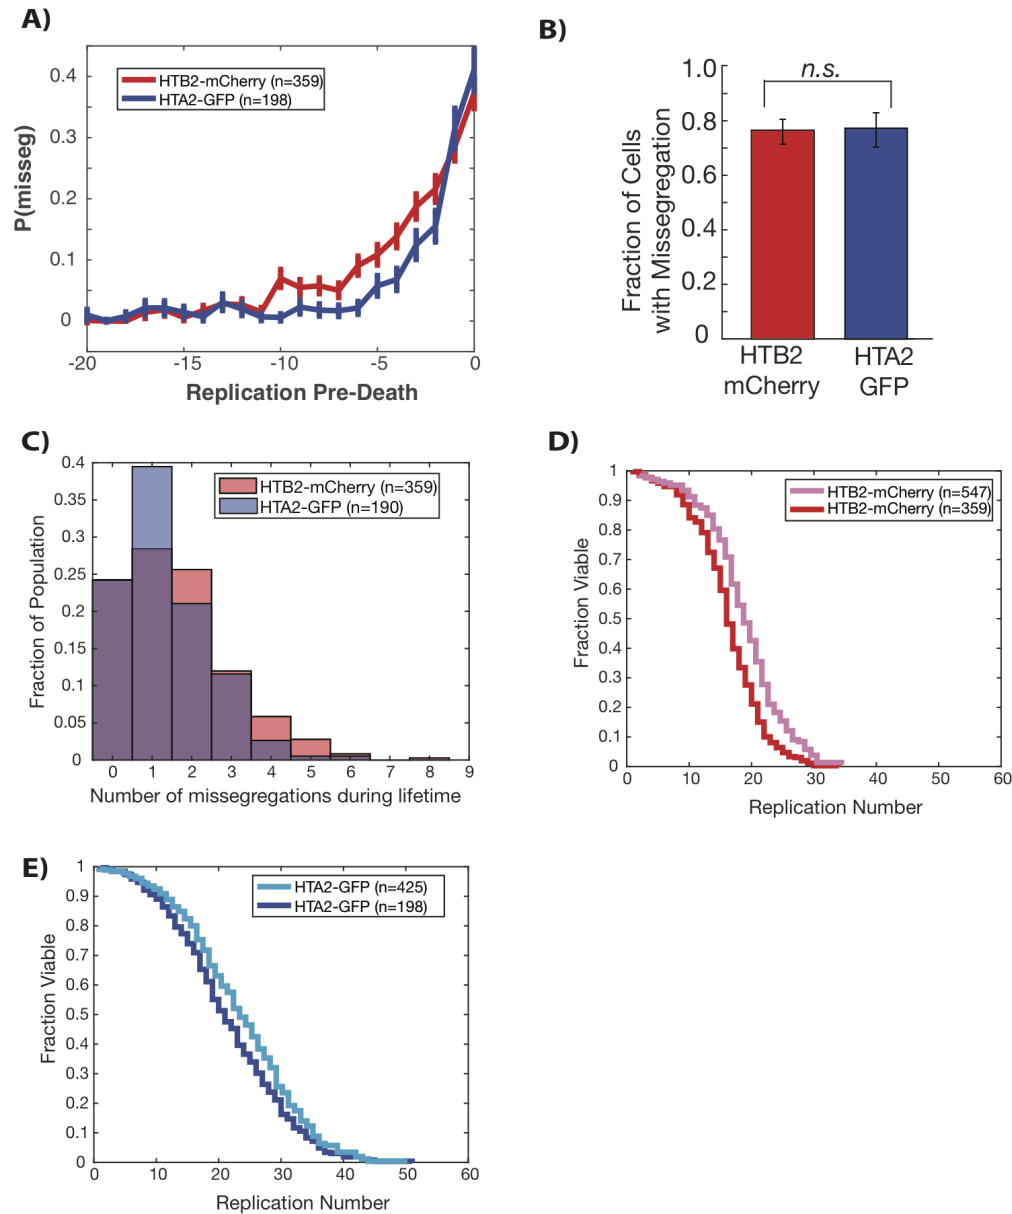

855  
 856 **Figure 1 – figure supplement 4. GLMs increase at end of life regardless of histone tagged**  
 857 **and fluorophore used. A)** Both Htb2:mCherry and Hta2:GFP strains experience a dramatic  
 858 increase in the probability of GLM events in the 5-6 divisions preceding death. Error bars are  
 859 standard error. **B)** There is no difference between Htb2:mCherry and Hta2:GFP with respect to  
 860 the fraction of cells that experience GLM events. Error bars are 95% confidence intervals from  
 861 bootstrapping over individual cells. **C)** The distribution of the number of GLM events that cells  
 862 experience over their lifetime is similar between the strains but statistically different ( $p=0.02$   
 863 two-tailed t-test), with Htb2:mCherry cells experiencing, on average, more events over their  
 864 lifetime. **D)** Replicative lifespan curves for Htb2:mCherry including censored cells (pink) and  
 865 excluding (red). **E)** Replicative lifespan curves for Hta2:GFP including censored cells (light  
 866 blue) and excluding (blue).

A)

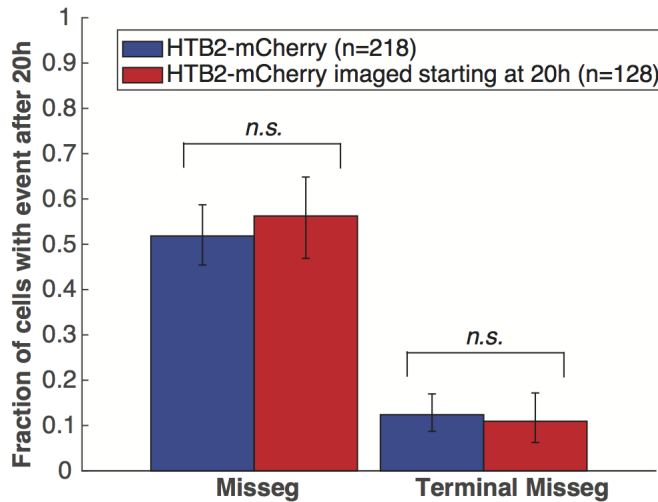

867  
868  
869  
870  
871  
872  
873  
874  
875  
876  
877  
878  
879

**Figure 1 – figure supplement 5. GLMs are not caused by imaging conditions.** A) To determine whether cells were affected by the cumulative exposure to fluorescence excitation energy, we compared GLM rates in cells imaged over their entire lifespans (blue) with those only imaged after they were already aged for 20 hours (red), corresponding to a median replicative age of 16 generations. This is equivalent to approximately 75% of the median lifespan of this strain. To compare these cells to the control, we only quantified GLMs that occurred after 20h. Error bars are 95% confidence intervals generated by bootstrapping with replacement over all cells. No difference was detected in cells imaged continuously over their entire lifespan or only after 20 hours, indicating that there is no cumulative effect of the exposure to fluorescence excitation light on the frequency of GLMs or the ability of cells to correct these through RETRN events.

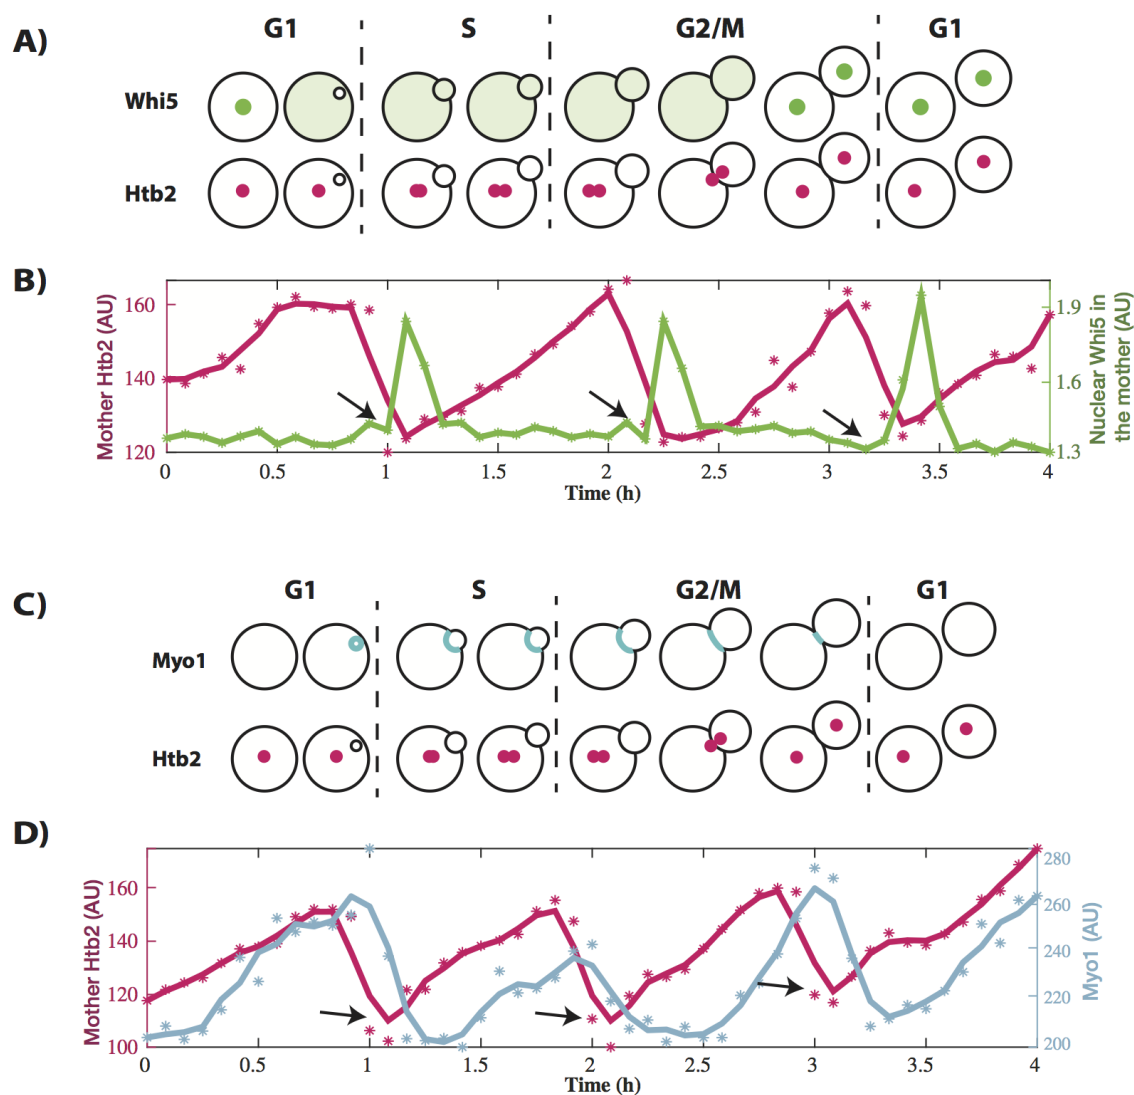

880  
 881 **Figure 2 – figure supplement 1. Single cell traces of the Whi5 and Myo1 data.** A) Schematic  
 882 showing the temporal dynamics of the proteins used to characterize missegregation events. Whi5  
 883 exits the nucleus to initiate START and move the cell into S phase. It re-enters the nucleus at the  
 884 end of mitosis. B) A representative trace of a single cell expressing Htb2:mCherry and  
 885 Whi5:GFP. Histone levels (pink) increase, and then fall during mitosis. Arrows indicate the  
 886 timepoint before Whi5 transitions from the cytoplasm to the nucleus. (\*) indicate raw Htb2  
 887 measurements, which were smoothed using a moving average for legibility (solid line). C)  
 888 Schematic showing the temporal dynamics of Myo1. Myo1 is produced at the end of G1 and  
 889 localizes to the bud neck until cytokinesis ends mitosis. D) Representative single cell trace of a  
 890 cell containing Htb2:mCherry and Myo1:GFP. (\*) indicate raw Htb2 or Myo1 measurements,  
 891 which were smoothed using a moving average for legibility (solid line). Arrows indicate the  
 892 lowest point of Htb2 levels following mitosis.

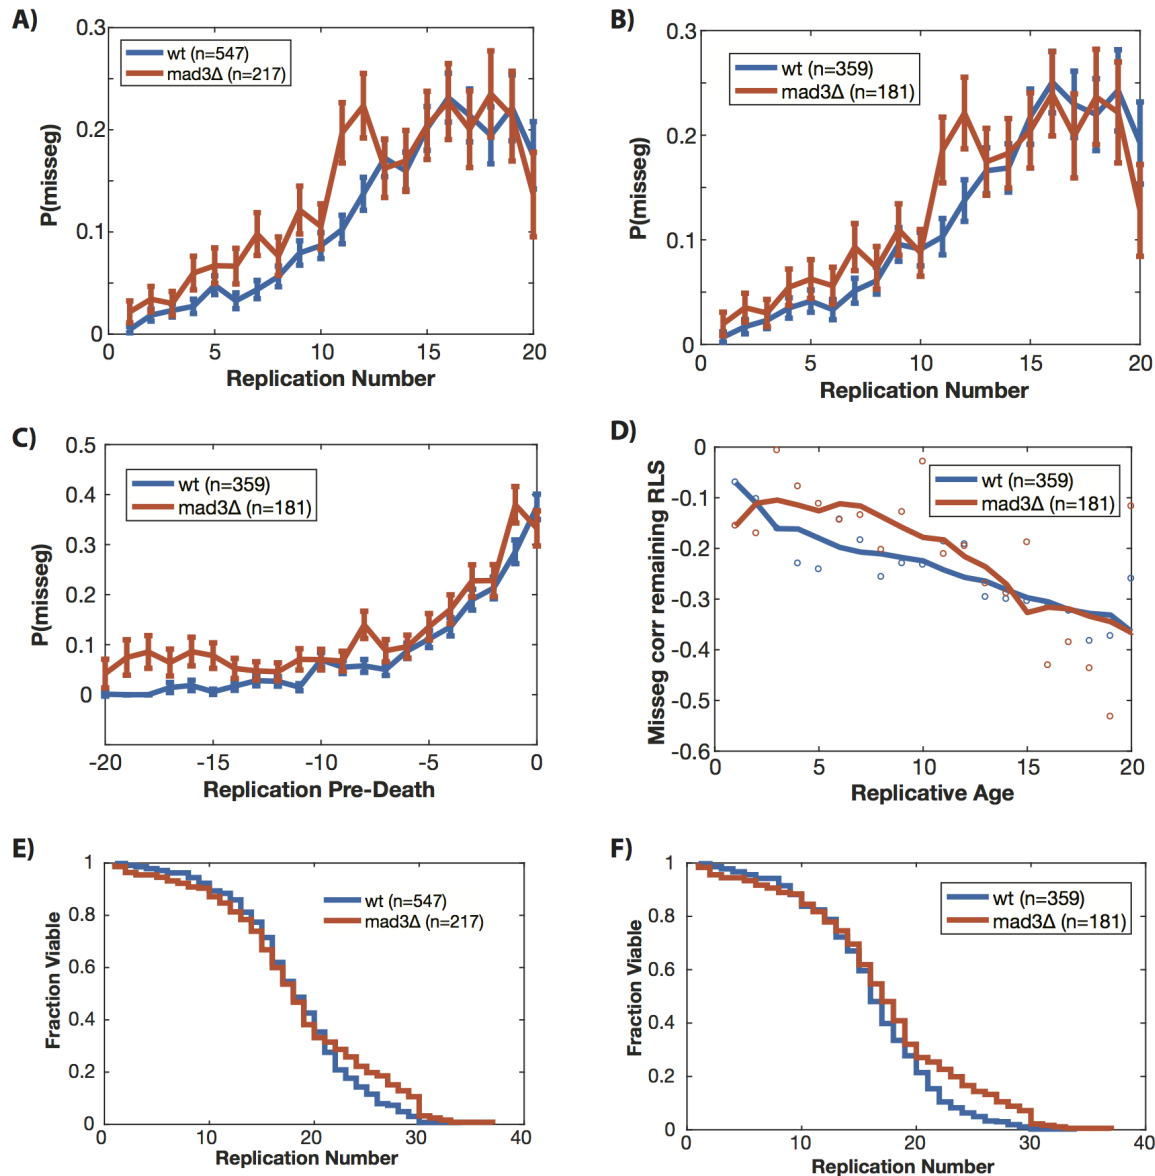

893  
 894 **Figure 2 – figure supplement 2. Removing Mad3 (mammalian BubR1) fails to affect the**  
 895 **age-related increase in missegregation rate.** **A)** Wild-type and *mad3Δ* cells experience a  
 896 similar increase in genome level missegregation (GLM) events with age when looking at all  
 897 cells. **B)** The increase in GLM rate is similar when only comparing cells that die or senesce in  
 898 the device. **C)** When only cells that die in the device are aligned by death, both *mad3Δ* and wild-  
 899 type cells experience a similar age-related increase in GLM rates that begins around 5 divisions  
 900 prior to death. **D)** At the single cell level, GLM events are equally strongly correlated with  
 901 impending mortality in both *mad3Δ* and wild-type cells. Dots show correlation between a GLM  
 902 and the remaining lifespan at that replicative age for that genotype. To show trends, these have  
 903 been smoothed with a moving average for legibility (solid line). **E)** RLS curve including  
 904 censored cells (used in A). **F)** RLS curve excluding censored cells (used in B-D). All error bars  
 905 are standard error.

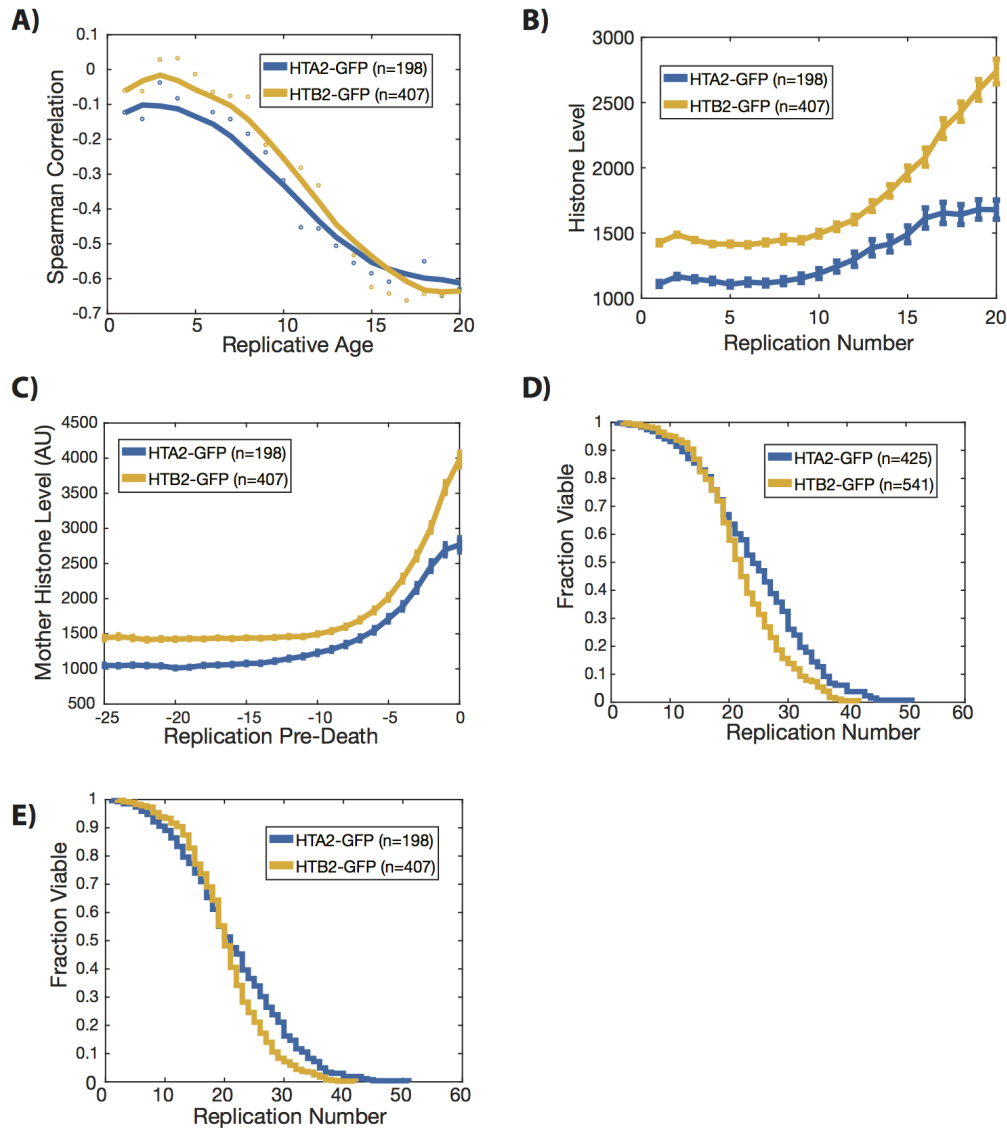

906

907

908

909

910

911

912

913

914

915

916

917

918

**Figure 3 – figure supplement 1. GFP tagged histone data.** Histones tagged with GFP increase during aging, and are predictive of mortality. **A)** At the single cell level, histone levels are strongly correlated with impending mortality, regardless of the histone tagged. Histones become increasingly negatively correlated with remaining replicative lifespan as the cells age. Dots show correlation between an individual histone and the remaining lifespan at that replicative age. To show trends, these have been smoothed with a moving average (solid line). **B)** Mean histone levels at each division aligned based on replicative age for each cell. **C)** Mean histone levels at each division aligned using individual cell death. This shows that, on average, all histones begin to increase sometime around 5-10 divisions prior to death. **D)** The replicative lifespans of the strains including censored cells. **E)** The replicative lifespan of only cells that die or senesce in the device. These are the cells that are used in the analysis for A-C. N values indicate the number of cells, and the error bars are standard error.

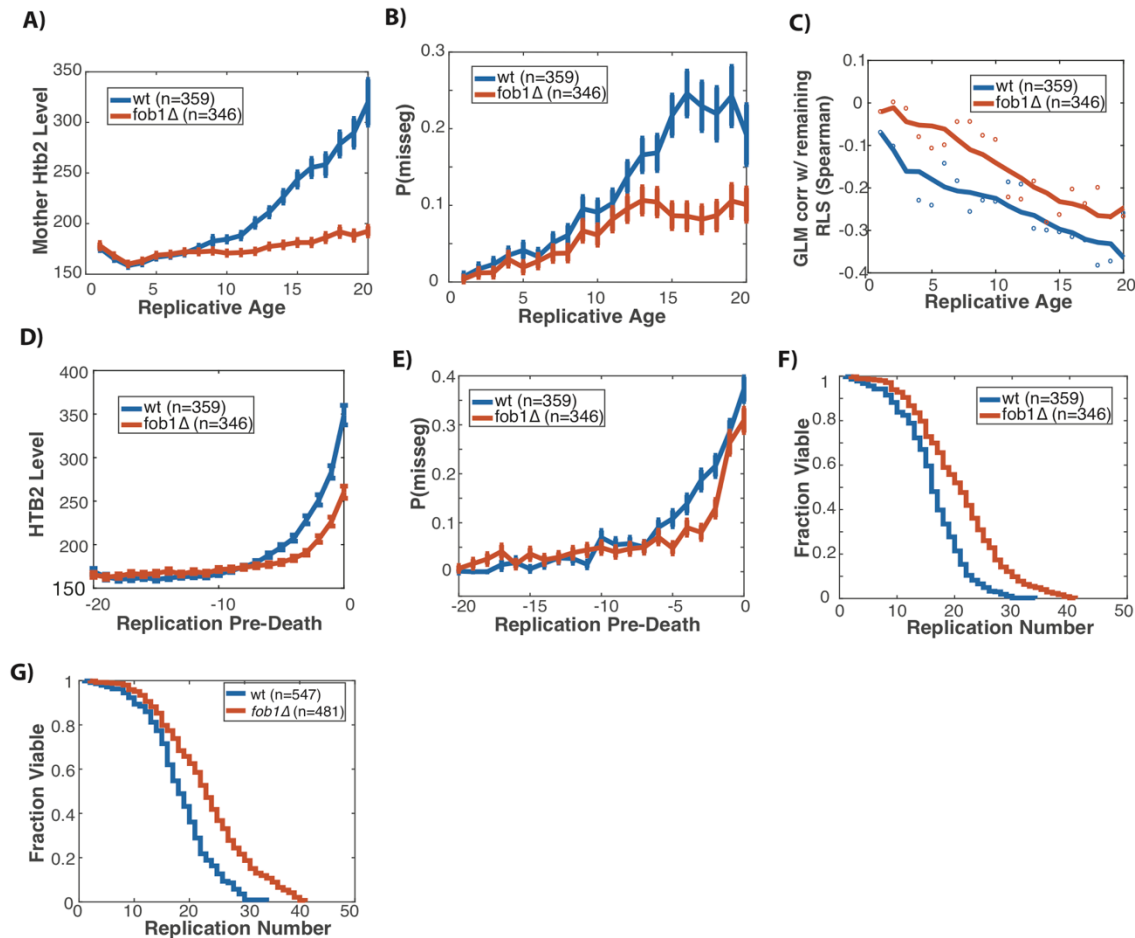

919  
 920 **Figure 3 – figure supplement 3. Fob1 vs Wild Type data.** **A)** Mean Htb2 levels of mother  
 921 cells aligned by birth and excluding cells that were censored (See Figure 3B) **B)** Mean  
 922 missegregation rates of wild-type and *fob1Δ* mother cells aligned by birth and excluding cells  
 923 that were censored (See Figure 4A). **C)** At the single cell level, missegregation events are less  
 924 strongly anti-correlated with remaining lifespan in *fob1Δ* compared with wild-type. The  
 925 correlation curve for *fob1Δ* cells appears parallel to wild-type, but with an offset that is roughly  
 926 proportional to the increase in replicative lifespan we observed for the *fob1Δ* cells. Excludes  
 927 censored cells. Dots show correlation between an individual histone and the remaining lifespan  
 928 at that replicative age. To show trends, these have been smoothed with a moving average (solid  
 929 line). **D)** Mean Htb2 levels of mother cells aligned by death instead of birth, excluding censored  
 930 cells. **E)** Probability of missegregation events for wild-type and *fob1Δ* cells, but aligned by death  
 931 instead of birth and excluding censored cells. **F)** Survival curve of wild-type and *fob1Δ* cells  
 932 containing only cells which are not lost and censored. These are the cells used in A-E. Survival  
 933 curves comparing wild-type cells and cells lacking *FOBI*. **G)** Survival curve including censored  
 934 cells lost during the experiment. Compared with wild-type cells, *fob1Δ* mutants live longer  
 935 ( $p < 1E-10$ , log-rank test). These are the cells used in the main figures. N-values report the number  
 936 of cells, and error bars for C,D,F are standard error.

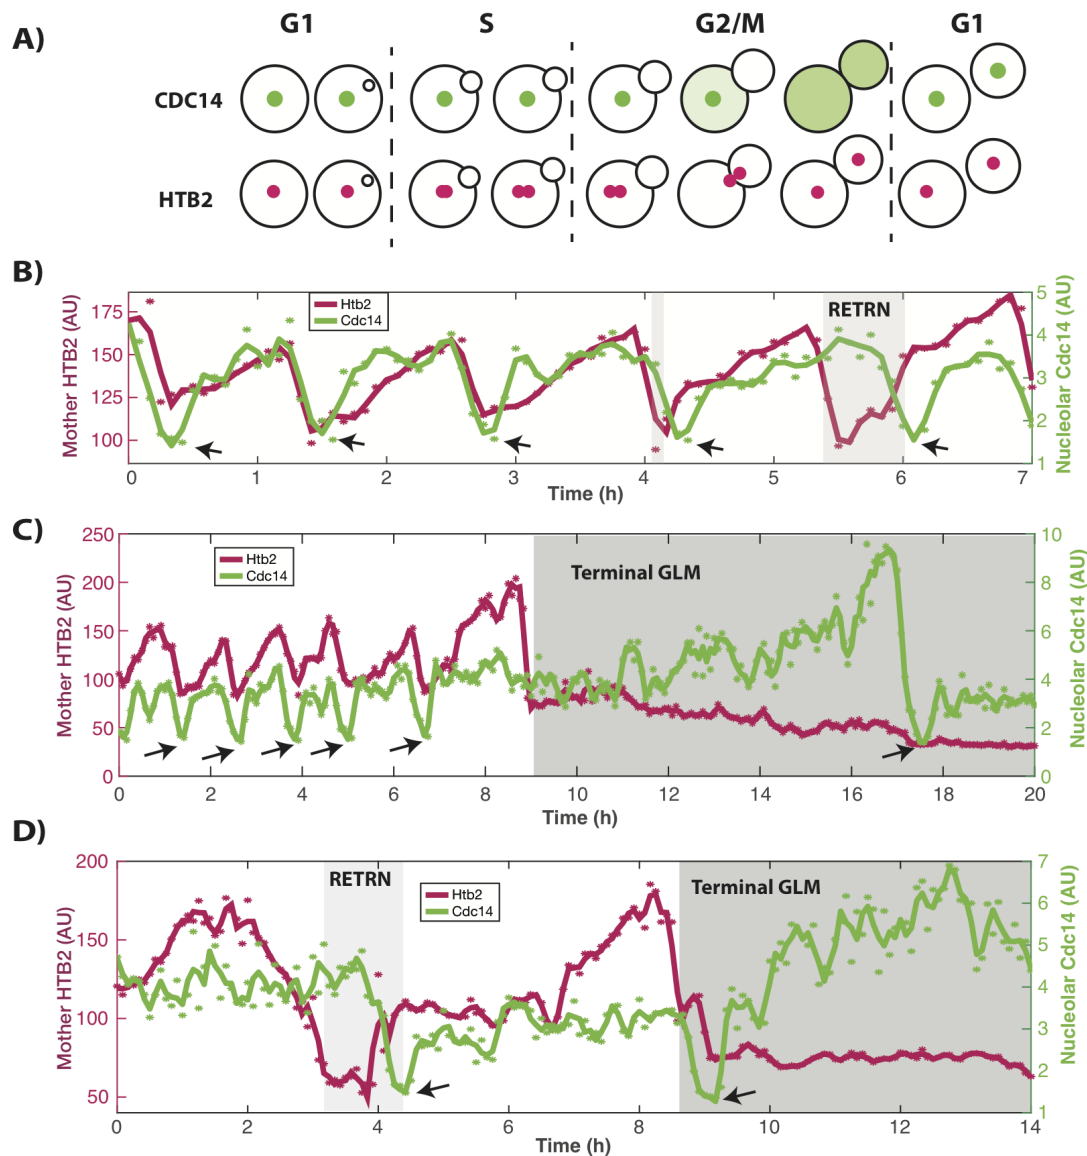

937

938

939

940

941

942

943

944

945

946

947

948

949

950

951

**Figure 4 – figure supplement 1. Cdc14 single cell traces in cells with terminal GLM and RETRN events.** **A)** Schematic showing cell cycle dynamics. Cdc14 is localized to the nucleolus during the majority of the cell cycle and exits it in two stages during mitosis. Cdc14 re-enters the nucleolus at the end of mitosis. **B)** A representative trace of a single cell expressing Htb2:mCherry and Cdc14:GFP showing normal divisions and RETRN events. Histone levels (pink) increase, and then fall during mitosis. Arrows indicate the timepoints where Cdc14 is at a minima in the nucleolus. In normal divisions this coincides with the Htb2 minima. (\*) indicate raw Htb2 and Cdc14 measurements, which were smoothed using a moving average and Savitzky-Golay smoothing respectively for legibility (solid line). In the last two divisions, a RETRN events can be observed. **C)** Representative trace of a single cell expressing Htb2:mCherry and Cdc14:GFP showing a terminal missegregations. Cdc14 exits the nucleolus nearly eight hours after the GLM, but there is no RETRN event. **D)** Representative trace of a single cell expressing Htb2:mCherry and Cdc14:GFP showing a GLM with a RETRN event (4h) and then a terminal missegregation.



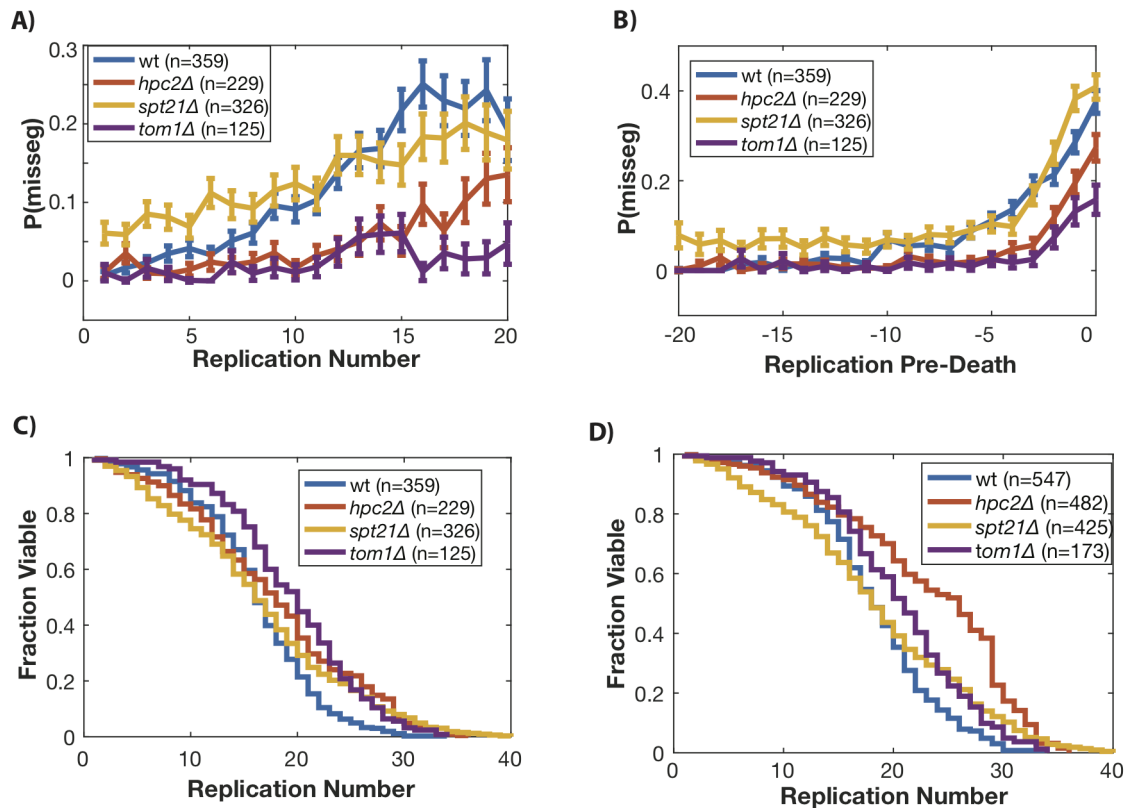

952  
953  
954  
955  
956  
957  
958  
959  
960  
961  
962  
963  
964  
965

**Figure 5 – figure supplement 1. Manipulating histone supply in yeast affects genome level missegregation (GLM) rates.** **A)** By manipulating the supply of histones through deleting *SPT21*, *TOM1* and *HPC2* we can affect the probability of GLMs occurring. **B)** Mean GLM rates for wild-type (wt), *spt21Δ*, *hpc2Δ* and *tom1Δ* mother cells aligned by birth and excluding cells that were censored (See Figure 4B). **C)** Survival curves of only cells that are not lost. These are the cells used for A,B. **D)** Survival curves which account for cells which are censored based on loss from the traps, for wt, *hpc2Δ* and *spt21Δ* and *tom1Δ*. These are the cells used in Figure 5 of the main text. Wild-type and *hpc2Δ* have different lifespans ( $p < 0.001$ , log-rank test), wild-type and *tom1Δ* have different lifespans ( $p < 0.001$ , log-rank test), and wild-type and *spt21Δ* do not have different lifespans ( $p = 0.1$  log-rank test). N-values indicate cell numbers, and error bars for A,B are standard error.

## 966 **Video Legends**

967 **Video 1** – Normal divisions followed by RETRN events in a strain expressing Htb2:mCherry  
968 and Myo1:GFP. The mother cell undergoes four normal divisions, and on the fifth (at timepoint  
969 7h:35min), it experiences a missegregation event. The bud neck is clearly maintained until the  
970 retrograde transport occurs at 12h. Following this event, the bud neck is quickly removed, and is  
971 completely gone by 12h:15min. The blue arrow points to the mother cell during timepoints  
972 where it is experiencing a missegregation event. Timestamp is Hours:Min

973 **Video 2** – RETRN events in a strain expressing Htb2:mCherry and Myo1:GFP. At timepoint  
974 1h:20min the mother cell experiences a missegregation event. The bud neck is clearly maintained  
975 until the retrograde transport occurs at 2h:40min. Following this event, the bud neck is quickly  
976 removed, and is completely gone by 2h:55min. The blue arrow points to the mother cell during  
977 timepoints where it is experiencing a missegregation event. Video is significantly slower than  
978 other Videos. Timestamp is Hours:Min.

979 **Video 3** - DNA colocalizes with tagged histones through mitosis. Cells expressing  
980 Htb2:mCherry were stained with Hoechst 3342, a live DNA stain. The first part of the video  
981 shows an overlay of red (Htb2:mCherry) and blue (Hoechst 3342), and the second shows the  
982 channels separated. As can be clearly seen in a normal cell cycle, the histones colocalize with the  
983 DNA, and both increase or decrease in fluorescence in the mother cell simultaneously.

984 **Video 4** - DNA colocalizes with tagged histones through mitosis, including during  
985 missegregation and RETRN events. Cells expressing Htb2:mCherry were stained with Hoechst  
986 3342, a live DNA stain. The first part of the video shows an overlay of red (Htb2:mCherry) and  
987 blue (Hoechst 3342), and the second shows the channels separated. As can be clearly seen, the  
988 histones colocalize with the DNA, and both increase or decrease in fluorescence in the mother  
989 cell simultaneously.

990 **Video 5** – Normal divisions in a strain expressing Htb2:mCherry and Nup49:GFP. This cell  
991 undergoes six divisions, with histone and nuclear envelope behavior that is characteristic of  
992 young, healthy cells. Timestamp is Hours:Min

993 **Video 6** – A missegregation followed by RETRN event in a strain expressing Htb2:mCherry and  
994 Nup49:GFP. The initial missegregation can be seen at timepoint 3h:30min, and the RETRN  
995 event at 8h:30min. Following the RETRN event, the mother cell is able to bud again at 12h, but  
996 the nuclear morphology of the daughter (for example, at 16h) is significantly altered. The blue  
997 arrow points to the mother cell during timepoints where it is experiencing a missegregation  
998 event. Timestamp is Hours:Min

999 **Video 7** – Terminal missegregations in a strain expressing Htb2:mCherry and Nup49:GFP. At  
1000 3h, the mother cell can be seen to undergo a missegregation event. At 15h:30min, the daughter  
1001 cell buds and can be seen to undergo mitosis, indicating that the daughter cell has separated from  
1002 the mother. The blue arrow points to the mother cell during timepoints where it is experiencing a  
1003 missegregation event. The mother cell eventually dies at 40h. Timestamp is Hours:Min.

1004 **Video 8** - A normal cell division, followed by a missegregation and RETRN event in a cell  
1005 expressing Htb2:mCherry and Spc72:GFP. The two green dots indicate the spindle poles, and at  
1006 numerous timepoints both poles enter the daughter cell. The blue arrow points to the mother cell  
1007 during timepoints where it is experiencing a missegregation event. Timestamp is Hours:Min

1008 **Video 9** - A terminal missegregation event in a cell expressing Htb2:mCherry and Spc72:GFP.  
1009 The two green dots indicate the spindle poles, and both poles enter the daughter around 2h40m.  
1010 The poles move around and are highly active, with one at times reentering the mother cell.  
1011 Finally, at 5h:20m, the daughter cell is washed away indicating it has fully separated from the

1012 mother and that this is a terminal missegregation. The blue arrow points to the mother cell during  
1013 timepoints where it is experiencing a missegregation event. Timestamp is Hours:Min.

1014 **Video 10** – Normal divisions followed RETRN events in a strain expressing Htb2:mCherry and  
1015 Tub1:GFP. The mother cell undergoes four divisions normally and on the fifth, at timepoint  
1016 7h:50min it experiences a missegregation event that is resolved by a RETRN event at  
1017 10h:30min. The blue arrow points to the mother cell during timepoints where it is experiencing a  
1018 missegregation event. Timestamp is Hours:Min

1019 **Video 11** – A terminal divisions followed RETRN events in a strain expressing Htb2:mCherry  
1020 and Tub1:GFP. At timepoint 3h:15min the mother experiences a missegregation event, and both  
1021 the chromatin and microtubules can be seen entering the daughter cell. At 7h:25 min the  
1022 daughter cell is washed away indicating the cell has completed cytokinesis. The blue arrow  
1023 points to the mother cell during timepoints where it is experiencing a missegregation event.  
1024 Timestamp is Hours:Min

1025 **Video 12** – Normal divisions, and an increase in histone levels in a strain expressing  
1026 Htb2:mCherry and Nup49:GFP. Over a period of 15h this cell grows normally and produces  
1027 daughters. The increase in Htb2:mCherry can be clearly seen over the course of this experiment.

1028 **Video 13** - Age related structural and morphological changes to the nucleolus. This strain is  
1029 expressing a nucleolar localized protein (Utp13:GFP) and Htb2:mCherry. In the young cell, the  
1030 green nucleolus is adjacent to the red genomic material. As the cell ages and accumulates ERCs,  
1031 the histone level begins to increase noticeably around 14h. This alters the nucleolar morphology  
1032 and size, and by 23h the nucleolar morphology is dramatically different and it surrounds a large  
1033 portion of the histones. Timestamp is Hours:Min.

1034 **Video 14** - Age related structural and morphological changes to the nucleolus. This strain is  
1035 expressing a nucleolar localized protein (Utp13:GFP) and Htb2:mCherry. In the young cell, the  
1036 green nucleolus is adjacent to the red genomic material. As the cell ages and accumulates ERCs,  
1037 the histone level begins to increase noticeably around 9h. This alters the nucleolar morphology  
1038 and size, and by 12h the nucleolar morphology is dramatically different and it surrounds a large  
1039 portion of the histones. Timestamp is Hours:Min.

1040 **Video 15** - A missegregation and RETRN event showing that the Cdc14 remains localized to the  
1041 nucleolus even when the cell experiences a missegregation event. The cell is expressing  
1042 Htb2:mCherry and Cdc14:GFP. The exit of Cdc14:GFP from the nucleolus at 2h coincides with  
1043 the RETRN event. The blue arrow points to the mother cell during timepoints where it is  
1044 experiencing a missegregation event. Timestamp is Hours:Min

1045 **Video 16** - ChrXII dynamics during a missegregation and RETRN event. Cell is expressing  
1046 Htb2:mCherry and LacI:GFP, and has LacO repeats inserted into ChrXII. The Chromosome XII  
1047 sister chromatids clearly remain behind despite the majority of the genome entering the daughter  
1048 cell. Simultaneous to the RETRN event, the sister chromatids separate and can be identified in  
1049 both mother and daughter cells. The blue arrow points to the mother cell during timepoints where  
1050 it is experiencing a missegregation event. Timestamp is Hours:Min

1051 **Video 17** - ChrXII dynamics during a missegregation and RETRN event. Cell is expressing  
1052 Htb2:mCherry and LacI:GFP, and has LacO repeats inserted into ChrXII. The Chromosome XII  
1053 sister chromatids clearly remain behind despite the majority of the genome entering the daughter  
1054 cell. Simultaneous to the RETRN event, the sister chromatids separate and can be identified in  
1055 both mother and daughter cells. The blue arrow points to the mother cell during timepoints where  
1056 it is experiencing a missegregation event. Timestamp is Hours:Min

1057 **Video 18** - ChrIV dynamics during a missegregation and RETRN event. Cell is expressing  
1058 Htb2:mCherry and TetR:GFP, and has TetO repeats inserted into ChrIV. The Chromosome IV  
1059 sister chromatids clearly move into the daughter with the majority of the genome. Simultaneous  
1060 to the RETRN event, the sister chromatids separate and can be identified in both mother and  
1061 daughter cells. The blue arrow points to the mother cell during timepoints where it is  
1062 experiencing a missegregation event. Timestamp is Hours:Min  
1063 **Video 19** - ChrV dynamics during a missegregation and RETRN event. Cell is expressing  
1064 Htb2:mCherry and TetR:GFP, and has TetO repeats inserted into ChrV. The Chromosome V  
1065 sister chromatids clearly move into the daughter with the majority of the genome. Simultaneous  
1066 to the RETRN event, the sister chromatids separate and can be identified in both mother and  
1067 daughter cells. The blue arrow points to the mother cell during timepoints where it is  
1068 experiencing a missegregation event. Timestamp is Hours:Min  
1069 **Video 20**- Cdc14 dynamics during normal cell divisions. Cell is expressing Htb2:mCherry and  
1070 Cdc14:GFP. Timestamp is Hours:Min  
1071 **Video 21** - Spindle pole dynamics during normal cell divisions. Cell is expressing Htb2:mCherry  
1072 and Spc72:GFP. Timestamp is Hours:Min  
1073 **Video 22** - Microtubule dynamics during normal cell divisions. Cell is expressing Htb2:mCherry  
1074 and Tub1:GFP. Timestamp is Hours:Min  
1075 **Video 23**- Bud neck dynamics during normal cell divisions. Cell is expressing Htb2:mCherry  
1076 and Myo1:GFP. Timestamp is Hours:Min  
1077  
1078
